# Supplementary material for: Identification of natural antimicrobial peptides from bacteria through metagenomic and metatranscriptomic analysis of high-throughput transcriptome data of Taiwanese oolong teas
Source: BMC Syst Biol. 2017 Dec 21;11(Suppl 7):131. doi: 10.1186/s12918-017-0503-4 (PMC5763296; doi:10.1186/s12918-017-0503-4)
Supplement: Supplementary file 5 — The results of Gene Ontology enrichment analysis. (XLSX 83 kb) [file 12918_2017_503_MOESM5_ESM.xlsx]

## Sheet: Dayuling _BP
Category		Term	Count	%	PValue	Genes	List Total	Pop Hits	Pop Total	Fold Enrichment	Bonferroni	Benjamini	FDR
GOTERM_BP_FAT	GO:0015949	nucleobase, nucleoside and nucleotide interconversion	7	0.0652681	1.54441e-07	PURH, PYRG, GUAA, CPDB, NRDF, GUAC, PURA	68	61	16709	28.1974	4.50958e-05	4.50958e-05	0.000205529
GOTERM_BP_FAT	GO:0006412	translation	9	0.0839161	7.46095e-06	RPLJ, RPSC, LYSS, RIMK, TUFA, GLYS, TUFB, RPLS, RPSH	68	253	16709	8.74105	0.00217623	0.00108871	0.00992852
GOTERM_BP_FAT	GO:0016052	carbohydrate catabolic process	10	0.0932401	0.000805575	ACKA, CITT, PTSP, RHAD, ARAH, ABGB, ARAJ, PFKA, LACI, XAPB	68	622	16709	3.95049	0.209684	0.0754433	1.06675
GOTERM_BP_FAT	GO:0044271	nitrogen compound biosynthetic process	13	0.121212	0.00207753	PURH, CADB, YGIF, CADA, GUAC, PURA, TRPC, HEMB, GUAA, PYRG, TYRA, POTA, HEMN	68	1164	16709	2.7443	0.455164	0.140855	2.72969
GOTERM_BP_FAT	GO:0006164	purine nucleotide biosynthetic process	5	0.04662	0.00371575	PURH, GUAA, YGIF, GUAC, PURA	68	158	16709	7.77597	0.66278	0.195395	4.83339
GOTERM_BP_FAT	GO:0009165	nucleotide biosynthetic process	6	0.0559441	0.00386622	PURH, PYRG, GUAA, YGIF, GUAC, PURA	68	260	16709	5.67048	0.67733	0.171817	5.02449
GOTERM_BP_FAT	GO:0006163	purine nucleotide metabolic process	5	0.04662	0.00424264	PURH, GUAA, YGIF, GUAC, PURA	68	164	16709	7.49148	0.711046	0.162518	5.501
GOTERM_BP_FAT	GO:0034404	nucleobase, nucleoside and nucleotide biosynthetic process	6	0.0559441	0.0103688	PURH, PYRG, GUAA, YGIF, GUAC, PURA	68	330	16709	4.46765	0.952332	0.316437	12.9517
GOTERM_BP_FAT	GO:0034654	nucleobase, nucleoside, nucleotide and nucleic acid biosynthetic process	6	0.0559441	0.0103688	PURH, PYRG, GUAA, YGIF, GUAC, PURA	68	330	16709	4.46765	0.952332	0.316437	12.9517
GOTERM_BP_FAT	GO:0006113	fermentation	3	0.027972	0.0140336	TDCE, HYCC, ZRAS	68	45	16709	16.3814	0.983866	0.367792	17.1452
GOTERM_BP_FAT	GO:0043648	dicarboxylic acid metabolic process	4	0.037296	0.028588	TRPC, CADB, TYRA, CADA	68	165	16709	5.95686	0.99979	0.571272	32.0223
GOTERM_BP_FAT	GO:0009123	nucleoside monophosphate metabolic process	3	0.027972	0.0321142	PURH, GUAA, YGIF	68	70	16709	10.5309	0.999927	0.579569	35.2338
GOTERM_BP_FAT	GO:0009124	nucleoside monophosphate biosynthetic process	3	0.027972	0.0321142	PURH, GUAA, YGIF	68	70	16709	10.5309	0.999927	0.579569	35.2338
GOTERM_BP_FAT	GO:0006793	phosphorus metabolic process	6	0.0559441	0.0345258	PHOH, ACKA, HYCC, PTSP, ZRAS, CREC	68	451	16709	3.26901	0.999965	0.574705	37.3487
GOTERM_BP_FAT	GO:0016310	phosphorylation	5	0.04662	0.0665912	ACKA, HYCC, PTSP, ZRAS, CREC	68	381	16709	3.22468	1	0.787299	60.0314
GOTERM_BP_FAT	GO:0007059	chromosome segregation	2	0.018648	0.0698028	XERC, MUKB	68	18	16709	27.3023	1	0.778912	61.8233
GOTERM_BP_FAT	GO:0006796	phosphate metabolic process	5	0.04662	0.0867739	ACKA, HYCC, PTSP, ZRAS, CREC	68	418	16709	2.93924	1	0.829159	70.1201
GOTERM_BP_FAT	GO:0009152	purine ribonucleotide biosynthetic process	3	0.027972	0.087272	PURH, GUAA, GUAC	68	123	16709	5.99319	1	0.811101	70.3363
GOTERM_BP_FAT	GO:0009150	purine ribonucleotide metabolic process	3	0.027972	0.0896947	PURH, GUAA, GUAC	68	125	16709	5.89729	1	0.800943	71.3672

## Sheet: Alishan _BP
Category		Term	Count	%	PValue	Genes	List Total	Pop Hits	Pop Total	Fold Enrichment	Bonferroni	Benjamini	FDR
GOTERM_BP_FAT	GO:0016052	carbohydrate catabolic process	18	0.139697	3.1052e-05	DCUA, MNGB, TKTA, TREC, YFEW, UHPT, HCAR, GLCA, LACZ, DGOT, PAAF, ZWF, EBGR, UIDB, LLDP, ARAF, ASCF, LACI	147	622	16709	3.28939	0.0130187	0.0130187	0.04364
GOTERM_BP_FAT	GO:0006023	aminoglycan biosynthetic process	6	0.0465658	0.000798875	MURB, YBJG, MURG, PBPC, HIPA, MRED	147	83	16709	8.21687	0.286277	0.155178	1.11712
GOTERM_BP_FAT	GO:0006024	glycosaminoglycan biosynthetic process	6	0.0465658	0.000798875	MURB, YBJG, MURG, PBPC, HIPA, MRED	147	83	16709	8.21687	0.286277	0.155178	1.11712
GOTERM_BP_FAT	GO:0009252	peptidoglycan biosynthetic process	6	0.0465658	0.000798875	MURB, YBJG, MURG, PBPC, HIPA, MRED	147	83	16709	8.21687	0.286277	0.155178	1.11712
GOTERM_BP_FAT	GO:0070589	cellular component macromolecule biosynthetic process	6	0.0465658	0.000938417	MURB, YBJG, MURG, PBPC, HIPA, MRED	147	86	16709	7.93023	0.327127	0.123717	1.31105
GOTERM_BP_FAT	GO:0044038	cell wall macromolecule biosynthetic process	6	0.0465658	0.000938417	MURB, YBJG, MURG, PBPC, HIPA, MRED	147	86	16709	7.93023	0.327127	0.123717	1.31105
GOTERM_BP_FAT	GO:0015849	organic acid transport	12	0.0931315	0.000941744	BRNQ, DCUA, YGJI, TNAB, LLDP, YHDZ, GLCA, GLTS, TYRP, YBIR, ANSP, ABGT	147	409	16709	3.33496	0.328071	0.0946202	1.31567
GOTERM_BP_FAT	GO:0046942	carboxylic acid transport	12	0.0931315	0.000941744	BRNQ, DCUA, YGJI, TNAB, LLDP, YHDZ, GLCA, GLTS, TYRP, YBIR, ANSP, ABGT	147	409	16709	3.33496	0.328071	0.0946202	1.31567
GOTERM_BP_FAT	GO:0010382	cellular cell wall macromolecule metabolic process	6	0.0465658	0.000988728	MURB, YBJG, MURG, PBPC, HIPA, MRED	147	87	16709	7.83908	0.341275	0.0800997	1.38089
GOTERM_BP_FAT	GO:0042546	cell wall biogenesis	6	0.0465658	0.00139897	MURB, YBJG, MURG, PBPC, HIPA, MRED	147	94	16709	7.25532	0.446105	0.093771	1.94863
GOTERM_BP_FAT	GO:0009273	peptidoglycan-based cell wall biogenesis	6	0.0465658	0.00139897	MURB, YBJG, MURG, PBPC, HIPA, MRED	147	94	16709	7.25532	0.446105	0.093771	1.94863
GOTERM_BP_FAT	GO:0015949	nucleobase, nucleoside and nucleotide interconversion	5	0.0388048	0.00198412	TKTA, URAA, CYTR, AMN, TSX	147	61	16709	9.31694	0.567481	0.112843	2.75318
GOTERM_BP_FAT	GO:0006528	asparagine metabolic process	3	0.0232829	0.003259	ASPA, ANSB, ANSP	147	10	16709	34.1	0.747803	0.158183	4.48488
GOTERM_BP_FAT	GO:0009066	aspartate family amino acid metabolic process	6	0.0465658	0.00350891	ASPA, YAGE, THRB, GLTS, ANSB, ANSP	147	116	16709	5.87931	0.773127	0.151952	4.82096
GOTERM_BP_FAT	GO:0008360	regulation of cell shape	5	0.0388048	0.00710936	MURB, YBJG, MURG, PBPC, MRED	147	87	16709	6.53257	0.950751	0.259986	9.5426
GOTERM_BP_FAT	GO:0022604	regulation of cell morphogenesis	5	0.0388048	0.00710936	MURB, YBJG, MURG, PBPC, MRED	147	87	16709	6.53257	0.950751	0.259986	9.5426
GOTERM_BP_FAT	GO:0009628	response to abiotic stimulus	5	0.0388048	0.0107214	OTSA, NHAR, ASR, DNAK, KUP	147	98	16709	5.79932	0.989421	0.338689	14.06
GOTERM_BP_FAT	GO:0006865	amino acid transport	8	0.0620877	0.0118216	BRNQ, YGJI, TNAB, YHDZ, GLTS, TYRP, ANSP, ABGT	147	281	16709	3.23606	0.993385	0.341771	15.3938
GOTERM_BP_FAT	GO:0044271	nitrogen compound biosynthetic process	19	0.147458	0.0128938	BRNQ, YAGE, YGEW, THRB, PURK, THII, THIL, GLTS, TYRP, ILVB, ASPA, HEMD, HEMF, TNAB, USG, ANSP, GLTB, YGGW, PNCA	147	1164	16709	1.85538	0.995816	0.34379	16.6751
GOTERM_BP_FAT	GO:0015837	amine transport	8	0.0620877	0.0166749	BRNQ, YGJI, TNAB, YHDZ, GLTS, TYRP, ANSP, ABGT	147	301	16709	3.02104	0.999172	0.39762	21.0512
GOTERM_BP_FAT	GO:0009067	aspartate family amino acid biosynthetic process	5	0.0388048	0.0178085	ASPA, YAGE, THRB, GLTS, ANSP	147	114	16709	4.98538	0.999491	0.396812	22.3209
GOTERM_BP_FAT	GO:0016051	carbohydrate biosynthetic process	12	0.0931315	0.0195875	OTSA, MURB, YBJG, WCAI, WECF, NAGB, MURG, WCAE, KDSC, PBPC, HIPA, MRED	147	617	16709	2.2107	0.999763	0.406517	24.2755
GOTERM_BP_FAT	GO:0042402	biogenic amine catabolic process	3	0.0232829	0.0199453	CAIB, TNAB, CAID	147	25	16709	13.64	0.999797	0.39354	24.663
GOTERM_BP_FAT	GO:0044036	cell wall macromolecule metabolic process	7	0.0543267	0.0214816	MURB, NLPD, YBJG, MURG, PBPC, HIPA, MRED	147	247	16709	3.22132	0.999895	0.398971	26.3062
GOTERM_BP_FAT	GO:0008652	cellular amino acid biosynthetic process	11	0.0853706	0.0226583	BRNQ, ILVB, ASPA, YAGE, THRB, TNAB, USG, GLTS, TYRP, ANSP, GLTB	147	550	16709	2.27333	0.999937	0.398928	27.5421
GOTERM_BP_FAT	GO:0006970	response to osmotic stress	3	0.0232829	0.0247074	OTSA, DNAK, KUP	147	28	16709	12.1786	0.999974	0.410142	29.6486
GOTERM_BP_FAT	GO:0042219	cellular amino acid derivative catabolic process	3	0.0232829	0.0298827	CAIB, TNAB, CAID	147	31	16709	11	0.999997	0.456462	34.7182
GOTERM_BP_FAT	GO:0006457	protein folding	6	0.0465658	0.0335158	SECB, DNAQ, CLPB, HTPG, DJLA, DNAK	147	204	16709	3.34314	0.999999	0.479994	38.072
GOTERM_BP_FAT	GO:0006811	ion transport	14	0.108653	0.035582	FHUC, FEPB, YICJ, GLCA, GLTS, ACTP, YFEO, UIDB, LLDP, FECA, TSX, CVRA, YBIR, KUP	147	851	16709	1.86996	1	0.485598	39.9072
GOTERM_BP_FAT	GO:0046677	response to antibiotic	6	0.0465658	0.0366099	FABI, YOJI, RLMN, MDTM, YBJG, MDTF	147	209	16709	3.26316	1	0.480975	40.8013
GOTERM_BP_FAT	GO:0006261	DNA-dependent DNA replication	5	0.0388048	0.0368095	DNAQ, TOPB, DNAC, RNHA, PRIA	147	143	16709	3.97436	1	0.46904	40.9735
GOTERM_BP_FAT	GO:0051186	cofactor metabolic process	12	0.0931315	0.0376038	ASPA, TKTA, HEMD, HEMF, FUMA, YGGC, PDXA, STHA, UBIG, ZWF, PNCA, YGGW	147	684	16709	1.99415	1	0.463189	41.654
GOTERM_BP_FAT	GO:0009309	amine biosynthetic process	11	0.0853706	0.0378537	BRNQ, ILVB, ASPA, YAGE, THRB, TNAB, USG, GLTS, TYRP, ANSP, GLTB	147	600	16709	2.08389	1	0.452902	41.8666
GOTERM_BP_FAT	GO:0046394	carboxylic acid biosynthetic process	12	0.0931315	0.0379393	BRNQ, FABI, ILVB, ASPA, YAGE, THRB, TNAB, USG, GLTS, TYRP, ANSP, GLTB	147	685	16709	1.99124	1	0.441739	41.9393
GOTERM_BP_FAT	GO:0015711	organic anion transport	4	0.0310438	0.0383991	LLDP, GLCA, GLTS, YBIR	147	85	16709	5.34902	1	0.434352	42.3281
GOTERM_BP_FAT	GO:0016053	organic acid biosynthetic process	12	0.0931315	0.0389584	BRNQ, FABI, ILVB, ASPA, YAGE, THRB, TNAB, USG, GLTS, TYRP, ANSP, GLTB	147	688	16709	1.98256	1	0.428206	42.7979
GOTERM_BP_FAT	GO:0030203	glycosaminoglycan metabolic process	6	0.0465658	0.0419164	MURB, YBJG, MURG, PBPC, HIPA, MRED	147	217	16709	3.14286	1	0.441727	45.2236
GOTERM_BP_FAT	GO:0000270	peptidoglycan metabolic process	6	0.0465658	0.0419164	MURB, YBJG, MURG, PBPC, HIPA, MRED	147	217	16709	3.14286	1	0.441727	45.2236
GOTERM_BP_FAT	GO:0006733	oxidoreduction coenzyme metabolic process	5	0.0388048	0.0435677	TKTA, STHA, UBIG, ZWF, PNCA	147	151	16709	3.7638	1	0.444252	46.5359
GOTERM_BP_FAT	GO:0006022	aminoglycan metabolic process	6	0.0465658	0.0454575	MURB, YBJG, MURG, PBPC, HIPA, MRED	147	222	16709	3.07207	1	0.4484	48.0018
GOTERM_BP_FAT	GO:0000271	polysaccharide biosynthetic process	10	0.0776096	0.047573	MURB, YBJG, WCAI, WECF, MURG, WCAE, KDSC, PBPC, HIPA, MRED	147	540	16709	2.10494	1	0.45391	49.5985
GOTERM_BP_FAT	GO:0006579	betaine catabolic process	2	0.0155219	0.0513024	CAIB, CAID	147	6	16709	37.8889	1	0.47006	52.3028
GOTERM_BP_FAT	GO:0042413	carnitine catabolic process	2	0.0155219	0.0513024	CAIB, CAID	147	6	16709	37.8889	1	0.47006	52.3028
GOTERM_BP_FAT	GO:0030001	metal ion transport	9	0.0698487	0.0521436	FHUC, UIDB, YICJ, FEPB, FECA, GLTS, ACTP, CVRA, KUP	147	466	16709	2.19528	1	0.466209	52.8939
GOTERM_BP_FAT	GO:0006732	coenzyme metabolic process	9	0.0698487	0.0532128	ASPA, TKTA, FUMA, YGGC, PDXA, STHA, UBIG, ZWF, PNCA	147	468	16709	2.1859	1	0.46402	53.6354
GOTERM_BP_FAT	GO:0006531	aspartate metabolic process	2	0.0155219	0.0595949	ASPA, GLTS	147	7	16709	32.4762	1	0.494576	57.8404
GOTERM_BP_FAT	GO:0019748	secondary metabolic process	5	0.0388048	0.0732095	TKTA, ISPG, STHA, ZWF, PNCA	147	180	16709	3.15741	1	0.560738	65.6545
GOTERM_BP_FAT	GO:0006529	asparagine biosynthetic process	2	0.0155219	0.0759645	ASPA, ANSP	147	9	16709	25.2593	1	0.565475	67.0621
GOTERM_BP_FAT	GO:0009820	alkaloid metabolic process	4	0.0310438	0.0765555	TKTA, STHA, ZWF, PNCA	147	113	16709	4.0236	1	0.559461	67.357
GOTERM_BP_FAT	GO:0046496	nicotinamide nucleotide metabolic process	4	0.0310438	0.0765555	TKTA, STHA, ZWF, PNCA	147	113	16709	4.0236	1	0.559461	67.357
GOTERM_BP_FAT	GO:0006769	nicotinamide metabolic process	4	0.0310438	0.0765555	TKTA, STHA, ZWF, PNCA	147	113	16709	4.0236	1	0.559461	67.357
GOTERM_BP_FAT	GO:0019362	pyridine nucleotide metabolic process	4	0.0310438	0.0846374	TKTA, STHA, ZWF, PNCA	147	118	16709	3.85311	1	0.588753	71.1513
GOTERM_BP_FAT	GO:0006631	fatty acid metabolic process	4	0.0310438	0.0913544	FABI, MHPC, FADK, PAAF	147	122	16709	3.72678	1	0.609442	73.9886
GOTERM_BP_FAT	GO:0015727	lactate transport	2	0.0155219	0.0920512	LLDP, GLCA	147	11	16709	20.6667	1	0.603931	74.2675
GOTERM_BP_FAT	GO:0006767	water-soluble vitamin metabolic process	6	0.0465658	0.0947694	CAIB, THII, THIL, PDXA, PNCA, CAID	147	276	16709	2.47101	1	0.606905	75.3295

## Sheet: Jinxuan _BP
Category		Term	Count	%	PValue	Genes	List Total	Pop Hits	Pop Total	Fold Enrichment	Bonferroni	Benjamini	FDR
GOTERM_BP_FAT	GO:0006412	translation	4	0.102854	0.00426987	RPLL, RPSS, RPLF, ASNC	23	253	16709	11.4858	0.484824	0.484824	5.00901
GOTERM_BP_FAT	GO:0042819	vitamin B6 biosynthetic process	2	0.0514271	0.0438497	PUUE, EPD	23	34	16709	42.734	0.999042	0.969042	41.6378
GOTERM_BP_FAT	GO:0008615	pyridoxine biosynthetic process	2	0.0514271	0.0438497	PUUE, EPD	23	34	16709	42.734	0.999042	0.969042	41.6378
GOTERM_BP_FAT	GO:0008614	pyridoxine metabolic process	2	0.0514271	0.0438497	PUUE, EPD	23	34	16709	42.734	0.999042	0.969042	41.6378
GOTERM_BP_FAT	GO:0042816	vitamin B6 metabolic process	2	0.0514271	0.0438497	PUUE, EPD	23	34	16709	42.734	0.999042	0.969042	41.6378
GOTERM_BP_FAT	GO:0016052	carbohydrate catabolic process	4	0.102854	0.0467261	GATA, UIDR, UXAC, LACZ	23	622	16709	4.67189	0.999399	0.915618	43.7117
GOTERM_BP_FAT	GO:0046394	carboxylic acid biosynthetic process	4	0.102854	0.0592033	METC, ASNC, TYRP, ACPP	23	685	16709	4.24221	0.999922	0.906036	51.9492
GOTERM_BP_FAT	GO:0016053	organic acid biosynthetic process	4	0.102854	0.0598341	METC, ASNC, TYRP, ACPP	23	688	16709	4.22371	0.99993	0.852314	52.3346
GOTERM_BP_FAT	GO:0006518	peptide metabolic process	2	0.0514271	0.0724653	ENTF, PEPT	23	57	16709	25.4905	0.999991	0.856771	59.4813

## Sheet: Oriental Beauty_BP
Category		Term	Count	%	PValue	Genes	List Total	Pop Hits	Pop Total	Fold Enrichment	Bonferroni	Benjamini	FDR
GOTERM_BP_FAT	GO:0016052	carbohydrate catabolic process	60	0.11217	1.98173e-14	DCUA, CPDA, SFSA, DCUB, MALG, PRPD, MURP, PAAF, YDJI, ALSB, AER, MGLC, ALSA, ACEF, GUDD, GLXR, MALT, LACI, PDHR, MALP, CHBC, MALY, SRLE, MALZ, CAIT, GLCA, LACZ, LACY, RBSA, YAGH, GLGP, SUCA, XYLE, XYLF, GHRB, XYLG, GLGX, AMIC, AMIB, GATD, XYLA, XYLB, ASCG, PFKB, ACS, MANA, AMPD, ZWF, UXAA, PTSG, UXAB, UIDA, MANY, PYKA, RBSC, LDCC, PTSP, IDNR, LPD, ARAC	522	622	16709	3.08774	1.57701e-11	1.57701e-11	3.03202e-11
GOTERM_BP_FAT	GO:0009061	anaerobic respiration	28	0.0523462	5.8553e-13	TDCE, NAPH, FDNI, FDNH, FUMB, NRFB, ACEF, ACNB, NUOC, DCUS, HYAC, NARH, NARG, LLDD, PFLA, PYKA, GLTA, HYFR, MENA, NUOL, HYDN, LPD, UGPC, HYFB, YBIY, FDOI, TORS, FDOG	522	159	16709	5.63691	4.67254e-10	2.33627e-10	8.98492e-10
GOTERM_BP_FAT	GO:0044271	nitrogen compound biosynthetic process	81	0.15143	1.42534e-11	YQEA, TDCC, THRA, LYSC, METR, GSS, HEMD, GLTI, MGTA, TGT, PROP, YIFB, GLTB, PURH, EUTT, ATPA, PURF, ARGD, PURL, MALY, THII, THIL, FLIY, ATPI, THIP, HEMY, PROB, QUEA, LIVG, PURA, TRPA, PYRE, TRPB, CARA, TRPE, TNAB, AVTA, RIBF, AROD, ULAD, RIBB, THIB, ARGH, ARGI, CADB, ASD, XDHA, CADA, BIOA, XDHD, COBT, BIOB, ILVH, MIND, RFBB, YBHA, SERS, BISC, SPEC, TYRA, SPEF, SDAC, ASNA, GMK, CYSK, NADB, LEUL, P…	522	1164	16709	2.22747	1.13743e-08	3.79143e-09	2.1872e-08
GOTERM_BP_FAT	GO:0015980	energy derivation by oxidation of organic compounds	39	0.0729108	3.63688e-09	TDCE, LDHA, NAPH, FDNI, FDNH, YODB, FUMB, ACEF, NRFB, ACNB, NUOC, DCUS, HYAC, NARH, NARG, LLDD, PFLA, PYKA, GLTA, GLGB, HYFR, MENA, NUOL, HYDN, LPD, GLGP, UGPC, SDHA, SUCA, HYFB, YBIY, FDOI, ARCB, GLGX, TORS, LRHA, FDOG, CYOB, UBIG	522	418	16709	2.98654	2.90223e-06	7.25558e-07	5.58079e-06
GOTERM_BP_FAT	GO:0006091	generation of precursor metabolites and energy	54	0.100953	1.86739e-08	TDCE, LDHA, FUMB, YODB, YDJI, NRFB, ACEF, NUOC, ACNB, DCUS, MGTA, NARH, NARG, PFLA, GLTA, PDHR, YKGF, GLGB, ATPA, HYFR, NUOL, ATPI, GLGP, UGPC, TORY, SUCA, HYFB, FDOI, TRXA, ARCB, GLGX, FDOG, RSXD, UBIG, PFKB, NAPH, FDNI, FDNH, HYAC, LLDD, PYKA, LDCC, CYSJ, MENA, YDIQ, HYDN, LPD, SDHA, YBIY, FIXC, TORS, LRHA, CYOB, RHO	522	746	16709	2.31705	1.49017e-05	2.98036e-06	2.86551e-05
GOTERM_BP_FAT	GO:0045333	cellular respiration	35	0.0654328	2.0242e-08	TDCE, NAPH, FDNI, FDNH, YODB, FUMB, ACEF, NRFB, ACNB, NUOC, DCUS, HYAC, NARH, NARG, LLDD, PFLA, PYKA, GLTA, HYFR, MENA, NUOL, HYDN, LPD, UGPC, SDHA, SUCA, HYFB, YBIY, FDOI, ARCB, TORS, LRHA, FDOG, CYOB, UBIG	522	371	16709	3.01977	1.6153e-05	2.69219e-06	3.10614e-05
GOTERM_BP_FAT	GO:0006412	translation	28	0.0523462	2.63612e-08	RPLL, SRA, SERS, ALAS, PRFA, INFB, PRFB, YIGZ, PTH, ASNA, TRUA, RPSB, RPSA, TSF, FRR, GLTX, FUSA, TUFA, TYRS, TUFB, ILES, PHET, EFP, RPSP, YCIH, RPLU, RPLT, RPSG	522	253	16709	3.54256	2.1036e-05	3.00518e-06	4.04513e-05
GOTERM_BP_FAT	GO:0009309	amine biosynthetic process	46	0.0859974	4.96169e-08	YQEA, CADB, TDCC, THRA, ASD, LYSC, CADA, METR, ILVH, SERS, GSS, SPEC, TYRA, SPEF, GLTI, SDAC, PROP, ASNA, GLTB, CYSK, LEUL, POTG, CYSJ, CYSI, ARGD, MALY, GLND, GLNA, FLIY, PROB, DAPF, LIVG, TRPA, DAPA, CARA, HISF, TRPB, TRPE, YAHI, TNAB, AVTA, AROD, LEUD, ARGH, FOLC, ARGI	522	600	16709	2.45407	3.95935e-05	4.94927e-06	7.6137e-05
GOTERM_BP_FAT	GO:0008652	cellular amino acid biosynthetic process	42	0.0785193	2.33896e-07	YQEA, CADB, TDCC, THRA, ASD, LYSC, CADA, METR, ILVH, SERS, TYRA, GLTI, SDAC, PROP, ASNA, GLTB, CYSK, LEUL, CYSJ, CYSI, ARGD, MALY, GLND, GLNA, FLIY, PROB, DAPF, LIVG, TRPA, DAPA, CARA, HISF, TRPB, TRPE, YAHI, TNAB, AVTA, AROD, LEUD, ARGH, ARGI, FOLC	522	550	16709	2.44437	0.000186632	2.07386e-05	0.000358913
GOTERM_BP_FAT	GO:0046394	carboxylic acid biosynthetic process	47	0.0878669	8.4055e-07	YQEA, CADB, TDCC, THRA, ASD, LYSC, CADA, BIOA, METR, BIOB, ILVH, SERS, BISC, TYRA, GLTI, SDAC, PROP, ASNA, FABR, GLTB, CYSK, LEUL, CYSJ, ARGD, CYSI, MALY, GLND, GLNA, SHIA, FLIY, PROB, DAPF, LIVG, TRPA, DAPA, CARA, HISF, TRPB, TRPE, YAHI, TNAB, AVTA, AROD, LEUD, ARGH, FOLC, ARGI	522	685	16709	2.19628	0.000670534	6.70736e-05	0.00128981
GOTERM_BP_FAT	GO:0016053	organic acid biosynthetic process	47	0.0878669	9.56372e-07	YQEA, CADB, TDCC, THRA, ASD, LYSC, CADA, BIOA, METR, BIOB, ILVH, SERS, BISC, TYRA, GLTI, SDAC, PROP, ASNA, FABR, GLTB, CYSK, LEUL, CYSJ, ARGD, CYSI, MALY, GLND, GLNA, SHIA, FLIY, PROB, DAPF, LIVG, TRPA, DAPA, CARA, HISF, TRPB, TRPE, YAHI, TNAB, AVTA, AROD, LEUD, ARGH, FOLC, ARGI	522	688	16709	2.1867	0.000762894	6.9378e-05	0.00146754
GOTERM_BP_FAT	GO:0034621	cellular macromolecular complex subunit organization	14	0.0261731	1.21084e-05	CUTA, FRR, NUSA, FDNI, NUSG, YODB, PRFA, NRFB, PRFB, FDOI, HYAC, RPLT, RHO, CCMF	522	99	16709	4.52661	0.00961599	0.000804886	0.0185786
GOTERM_BP_FAT	GO:0043933	macromolecular complex subunit organization	17	0.0317816	2.01015e-05	CUTA, FLIA, FRR, RPOD, NUSA, FDNI, RPON, NUSG, YODB, PRFA, NRFB, PRFB, FDOI, HYAC, RPLT, RHO, CCMF	522	151	16709	3.60373	0.0159132	0.00123318	0.0308413
GOTERM_BP_FAT	GO:0019395	fatty acid oxidation	8	0.0149561	3.00242e-05	MHPD, ATOB, MHPB, YHJY, SCPA, MHPF, ATOE, FADH	522	30	16709	8.53589	0.0236749	0.00170994	0.0460621
GOTERM_BP_FAT	GO:0034440	lipid oxidation	8	0.0149561	3.00242e-05	MHPD, ATOB, MHPB, YHJY, SCPA, MHPF, ATOE, FADH	522	30	16709	8.53589	0.0236749	0.00170994	0.0460621
GOTERM_BP_FAT	GO:0030258	lipid modification	8	0.0149561	4.70277e-05	MHPD, ATOB, MHPB, YHJY, SCPA, MHPF, ATOE, FADH	522	32	16709	8.00239	0.0368335	0.00249881	0.0721397
GOTERM_BP_FAT	GO:0009060	aerobic respiration	15	0.0280426	7.65619e-05	NUOL, LPD, FUMB, UGPC, SDHA, SUCA, ACNB, NUOC, ARCB, LRHA, HYAC, LLDD, CYOB, GLTA, UBIG	522	134	16709	3.58316	0.0592697	0.00381139	0.11742
GOTERM_BP_FAT	GO:0044272	sulfur compound biosynthetic process	18	0.0336511	9.74669e-05	CYSK, CYSJ, THRA, CYSI, ASD, THII, MALY, THIL, FLIY, BIOA, METR, THIP, BIOB, SERS, BISC, YBDK, GSHA, THIB	522	190	16709	3.03249	0.0748343	0.00456498	0.149458
GOTERM_BP_FAT	GO:0006261	DNA-dependent DNA replication	15	0.0280426	0.000154259	DNAB, TOPB, YCDX, UVRD, DNAE, RECG, DFP, DNAQ, TUS, HDA, HOLB, RECQ, RNHA, PARE, SEQA	522	143	16709	3.35765	0.115832	0.00681599	0.236448
GOTERM_BP_FAT	GO:0006790	sulfur metabolic process	21	0.0392597	0.000254415	CYSK, CYSJ, THRA, CYSI, YJCS, ASD, MALY, THII, THIL, FLIY, CYSD, BIOA, METR, THIP, BIOB, SERS, BISC, YBDK, ISCS, GSHA, THIB	522	265	16709	2.53661	0.183762	0.0106299	0.389688
GOTERM_BP_FAT	GO:0006351	transcription, DNA-dependent	9	0.0168256	0.000411784	FLIA, RPOD, RPOC, NUSA, RPOB, RPOA, RPON, NUSG, RHO	522	58	16709	4.967	0.280121	0.0162993	0.63002
GOTERM_BP_FAT	GO:0043241	protein complex disassembly	6	0.011217	0.000490275	PRFA, PRFB, FRR, NUSA, NUSG, RHO	522	22	16709	8.72989	0.323847	0.0184625	0.749686
GOTERM_BP_FAT	GO:0022411	cellular component disassembly	6	0.011217	0.000490275	PRFA, PRFB, FRR, NUSA, NUSG, RHO	522	22	16709	8.72989	0.323847	0.0184625	0.749686
GOTERM_BP_FAT	GO:0043624	cellular protein complex disassembly	6	0.011217	0.000490275	PRFA, PRFB, FRR, NUSA, NUSG, RHO	522	22	16709	8.72989	0.323847	0.0184625	0.749686
GOTERM_BP_FAT	GO:0032984	macromolecular complex disassembly	6	0.011217	0.000490275	PRFA, PRFB, FRR, NUSA, NUSG, RHO	522	22	16709	8.72989	0.323847	0.0184625	0.749686
GOTERM_BP_FAT	GO:0034623	cellular macromolecular complex disassembly	6	0.011217	0.000490275	PRFA, PRFB, FRR, NUSA, NUSG, RHO	522	22	16709	8.72989	0.323847	0.0184625	0.749686
GOTERM_BP_FAT	GO:0009070	serine family amino acid biosynthetic process	9	0.0168256	0.000520565	CYSK, CYSJ, THRA, CYSI, ASD, LYSC, FLIY, SDAC, SERS	522	60	16709	4.80144	0.340002	0.01871	0.795831
GOTERM_BP_FAT	GO:0015949	nucleobase, nucleoside and nucleotide interconversion	9	0.0168256	0.000583074	PURH, GUAB, NUPC, DEOB, GUAC, APAH, SPOT, PURA, GMK	522	61	16709	4.72272	0.372134	0.0200327	0.890994
GOTERM_BP_FAT	GO:0043648	dicarboxylic acid metabolic process	15	0.0280426	0.000671661	CADB, ARGD, ASD, SHIA, CADA, LYSC, DAPF, TRPA, TRPB, DAPA, TRPE, GUDD, TYRA, TNAB, AROD	522	165	16709	2.90996	0.415013	0.0220925	1.02571
GOTERM_BP_FAT	GO:0034404	nucleobase, nucleoside and nucleotide biosynthetic process	23	0.0429987	0.000707535	PURH, NADB, ATPA, PURF, XDHA, PURL, XDHD, ATPI, COBT, RFBB, YBHA, GUAC, QUEA, PURA, PYRE, CARA, GUAB, YAHI, MGTA, TGT, ULAD, RHO, GMK	522	330	16709	2.23097	0.431533	0.0223392	1.08022
GOTERM_BP_FAT	GO:0034654	nucleobase, nucleoside, nucleotide and nucleic acid biosynthetic process	23	0.0429987	0.000707535	PURH, NADB, ATPA, PURF, XDHA, PURL, XDHD, ATPI, COBT, RFBB, YBHA, GUAC, QUEA, PURA, PYRE, CARA, GUAB, YAHI, MGTA, TGT, ULAD, RHO, GMK	522	330	16709	2.23097	0.431533	0.0223392	1.08022
GOTERM_BP_FAT	GO:0032774	RNA biosynthetic process	10	0.0186951	0.000844051	FLIA, DNAB, RPOD, RPOC, NUSA, RPOB, RPOA, RPON, NUSG, RHO	522	80	16709	4.0012	0.490251	0.0255838	1.28738
GOTERM_BP_FAT	GO:0009067	aspartate family amino acid biosynthetic process	12	0.0224341	0.000866838	CADB, DAPA, TDCC, ARGD, THRA, ASD, MALY, CADA, LYSC, ASNA, METR, DAPF	522	114	16709	3.36943	0.499444	0.0253053	1.32192
GOTERM_BP_FAT	GO:0006793	phosphorus metabolic process	28	0.0523462	0.000984311	CITA, PSIF, QSEC, PITA, PITB, PHOA, BARA, CHEA, DCUS, MGTA, YEGI, RCSD, YEDV, ATPA, THIK, CPXA, NUOL, PHNC, PTSP, ATPI, GLRK, HYFB, ARCB, EVGS, BAES, TORS, PHNP, RHO	522	451	16709	1.98729	0.544275	0.0276765	1.49981
GOTERM_BP_FAT	GO:0009066	aspartate family amino acid metabolic process	12	0.0224341	0.00100164	CADB, DAPA, TDCC, ARGD, THRA, ASD, MALY, CADA, LYSC, ASNA, METR, DAPF	522	116	16709	3.31134	0.55054	0.0271994	1.52602
GOTERM_BP_FAT	GO:0006023	aminoglycan biosynthetic process	10	0.0186951	0.00110194	MRCB, GLMU, PRC, ISPU, AMIC, MLTB, AMIB, MLTC, DDLA, NAGZ	522	83	16709	3.85658	0.585148	0.0289019	1.67763
GOTERM_BP_FAT	GO:0006024	glycosaminoglycan biosynthetic process	10	0.0186951	0.00110194	MRCB, GLMU, PRC, ISPU, AMIC, MLTB, AMIB, MLTC, DDLA, NAGZ	522	83	16709	3.85658	0.585148	0.0289019	1.67763
GOTERM_BP_FAT	GO:0009252	peptidoglycan biosynthetic process	10	0.0186951	0.00110194	MRCB, GLMU, PRC, ISPU, AMIC, MLTB, AMIB, MLTC, DDLA, NAGZ	522	83	16709	3.85658	0.585148	0.0289019	1.67763
GOTERM_BP_FAT	GO:0070589	cellular component macromolecule biosynthetic process	10	0.0186951	0.00142012	MRCB, GLMU, PRC, ISPU, AMIC, MLTB, AMIB, MLTC, DDLA, NAGZ	522	86	16709	3.72204	0.678277	0.0359217	2.15712
GOTERM_BP_FAT	GO:0044038	cell wall macromolecule biosynthetic process	10	0.0186951	0.00142012	MRCB, GLMU, PRC, ISPU, AMIC, MLTB, AMIB, MLTC, DDLA, NAGZ	522	86	16709	3.72204	0.678277	0.0359217	2.15712
GOTERM_BP_FAT	GO:0006631	fatty acid metabolic process	12	0.0224341	0.00151355	MHPD, ATOB, MHPB, YHJY, FABR, SCPA, FADK, MHPF, PAAF, ATOE, FADH, FADI	522	122	16709	3.14848	0.701422	0.0370682	2.29749
GOTERM_BP_FAT	GO:0000096	sulfur amino acid metabolic process	10	0.0186951	0.00154125	CYSK, CYSJ, THRA, CYSI, ASD, MALY, ISCS, FLIY, METR, SERS	522	87	16709	3.67926	0.70796	0.0366119	2.33908
GOTERM_BP_FAT	GO:0010382	cellular cell wall macromolecule metabolic process	10	0.0186951	0.00154125	MRCB, GLMU, PRC, ISPU, AMIC, MLTB, AMIB, MLTC, DDLA, NAGZ	522	87	16709	3.67926	0.70796	0.0366119	2.33908
GOTERM_BP_FAT	GO:0006970	response to osmotic stress	6	0.011217	0.0015683	OPGH, OPGD, DDPX, TUFA, TUFB, PROP	522	28	16709	6.8592	0.714207	0.0361676	2.37967
GOTERM_BP_FAT	GO:0007626	locomotory behavior	11	0.0205646	0.00162388	FLIA, AER, FLHA, CHEB, FLHC, FLGG, FLID, TRG, FLGE, CHEA, NIKA	522	105	16709	3.35338	0.726626	0.0363765	2.46303
GOTERM_BP_FAT	GO:0007610	behavior	11	0.0205646	0.00162388	FLIA, AER, FLHA, CHEB, FLHC, FLGG, FLID, TRG, FLGE, CHEA, NIKA	522	105	16709	3.35338	0.726626	0.0363765	2.46303
GOTERM_BP_FAT	GO:0042330	taxis	11	0.0205646	0.00162388	FLIA, AER, FLHA, CHEB, FLHC, FLGG, FLID, TRG, FLGE, CHEA, NIKA	522	105	16709	3.35338	0.726626	0.0363765	2.46303
GOTERM_BP_FAT	GO:0007049	cell cycle	13	0.0243036	0.00174882	YCIB, FTSY, XERC, ISPU, MUKB, DAMX, FTSA, MIND, ACRF, ACRE, NAGZ, YCEA, DICB	522	143	16709	2.90996	0.752608	0.0380564	2.65016
GOTERM_BP_FAT	GO:0006553	lysine metabolic process	7	0.0130866	0.00180426	CADB, DAPA, ARGD, ASD, CADA, LYSC, DAPF	522	42	16709	5.33493	0.763333	0.0381999	2.73309
GOTERM_BP_FAT	GO:0009085	lysine biosynthetic process	7	0.0130866	0.00180426	CADB, DAPA, ARGD, ASD, CADA, LYSC, DAPF	522	42	16709	5.33493	0.763333	0.0381999	2.73309
GOTERM_BP_FAT	GO:0046451	diaminopimelate metabolic process	7	0.0130866	0.00180426	CADB, DAPA, ARGD, ASD, CADA, LYSC, DAPF	522	42	16709	5.33493	0.763333	0.0381999	2.73309
GOTERM_BP_FAT	GO:0009089	lysine biosynthetic process via diaminopimelate	7	0.0130866	0.00180426	CADB, DAPA, ARGD, ASD, CADA, LYSC, DAPF	522	42	16709	5.33493	0.763333	0.0381999	2.73309
GOTERM_BP_FAT	GO:0000097	sulfur amino acid biosynthetic process	9	0.0168256	0.00209798	CYSK, CYSJ, THRA, CYSI, ASD, MALY, FLIY, METR, SERS	522	74	16709	3.89306	0.812868	0.0431453	3.17135
GOTERM_BP_FAT	GO:0009273	peptidoglycan-based cell wall biogenesis	10	0.0186951	0.00264001	MRCB, GLMU, PRC, ISPU, AMIC, MLTB, AMIB, MLTC, DDLA, NAGZ	522	94	16709	3.40527	0.878703	0.0526533	3.97528
GOTERM_BP_FAT	GO:0042546	cell wall biogenesis	10	0.0186951	0.00264001	MRCB, GLMU, PRC, ISPU, AMIC, MLTB, AMIB, MLTC, DDLA, NAGZ	522	94	16709	3.40527	0.878703	0.0526533	3.97528
GOTERM_BP_FAT	GO:0006767	water-soluble vitamin metabolic process	19	0.0355207	0.00266152	PDXH, EUTT, NADB, THII, THIL, BIOA, COBT, THIP, BIOB, RFBB, MIND, BISC, FIXC, PUUE, RIBF, ULAD, RIBB, THIB, FOLC	522	276	16709	2.20356	0.880773	0.0517794	4.00705
GOTERM_BP_FAT	GO:0022900	electron transport chain	21	0.0392597	0.00310105	CYSJ, NAPH, YDIQ, FDNI, NUOL, HYDN, FDNH, YODB, SDHA, TORY, NRFB, HYFB, FDOI, FIXC, TRXA, NARH, HYAC, NARG, RSXD, CYOB, YKGF	522	325	16709	2.06831	0.91613	0.05866	4.65417
GOTERM_BP_FAT	GO:0043039	tRNA aminoacylation	9	0.0168256	0.00317303	ALAS, PHET, GLTX, PTH, TYRS, ASNA, ILES, TRUA, SERS	522	79	16709	3.64666	0.920826	0.0585965	4.75975
GOTERM_BP_FAT	GO:0006418	tRNA aminoacylation for protein translation	9	0.0168256	0.00317303	ALAS, PHET, GLTX, PTH, TYRS, ASNA, ILES, TRUA, SERS	522	79	16709	3.64666	0.920826	0.0585965	4.75975
GOTERM_BP_FAT	GO:0043038	amino acid activation	9	0.0168256	0.00317303	ALAS, PHET, GLTX, PTH, TYRS, ASNA, ILES, TRUA, SERS	522	79	16709	3.64666	0.920826	0.0585965	4.75975
GOTERM_BP_FAT	GO:0009084	glutamine family amino acid biosynthetic process	11	0.0205646	0.00318635	CARA, ARGD, YAHI, GLND, GLNA, GLTI, PROP, PROB, ARGH, ARGI, GLTB	522	115	16709	3.06179	0.921666	0.0575074	4.77928
GOTERM_BP_FAT	GO:0009628	response to abiotic stimulus	10	0.0186951	0.00350237	IBPA, NHAB, MANA, OPGH, NFO, OPGD, DDPX, TUFA, TUFB, PROP	522	98	16709	3.26628	0.939178	0.0616495	5.24145
GOTERM_BP_FAT	GO:0009069	serine family amino acid metabolic process	10	0.0186951	0.00350237	CYSK, CYSJ, THRA, CYSI, ASD, LYSC, ISCS, FLIY, SDAC, SERS	522	98	16709	3.26628	0.939178	0.0616495	5.24145
GOTERM_BP_FAT	GO:0042364	water-soluble vitamin biosynthetic process	17	0.0317816	0.00425637	PDXH, EUTT, NADB, THII, THIL, BIOA, COBT, THIP, BIOB, RFBB, MIND, BISC, PUUE, RIBF, RIBB, THIB, FOLC	522	244	16709	2.23018	0.966754	0.0728507	6.33572
GOTERM_BP_FAT	GO:0006766	vitamin metabolic process	20	0.0373902	0.00435648	PDXH, EUTT, NADB, THII, THIL, MENA, BIOA, COBT, THIP, BIOB, RFBB, MIND, BISC, FIXC, PUUE, RIBF, ULAD, RIBB, THIB, FOLC	522	312	16709	2.0519	0.969318	0.0729433	6.48012
GOTERM_BP_FAT	GO:0006073	cellular glucan metabolic process	7	0.0130866	0.00443318	GLGB, OPGH, GLGX, OPGD, YEDQ, BCSA, GLGP	522	50	16709	4.48134	0.971147	0.072662	6.59062
GOTERM_BP_FAT	GO:0006308	DNA catabolic process	6	0.011217	0.00490381	NFO, RECB, MCRB, RECE, YBHP, SBCC	522	36	16709	5.33493	0.980216	0.078476	7.26591
GOTERM_BP_FAT	GO:0046128	purine ribonucleoside metabolic process	9	0.0168256	0.00534492	ENTF, XDHA, COAE, TGT, XDHD, QUEA, PANF, SPOT, DFP	522	86	16709	3.34984	0.986111	0.0835789	7.8947
GOTERM_BP_FAT	GO:0018106	peptidyl-histidine phosphorylation	13	0.0243036	0.00537103	YEDV, CITA, QSEC, DCUS, ARCB, BAES, EVGS, TORS, CPXA, GLRK, BARA, RCSD, CHEA	522	164	16709	2.53734	0.986399	0.0823623	7.93179
GOTERM_BP_FAT	GO:0018202	peptidyl-histidine modification	13	0.0243036	0.00537103	YEDV, CITA, QSEC, DCUS, ARCB, BAES, EVGS, TORS, CPXA, GLRK, BARA, RCSD, CHEA	522	164	16709	2.53734	0.986399	0.0823623	7.93179
GOTERM_BP_FAT	GO:0006468	protein amino acid phosphorylation	14	0.0261731	0.00539537	CITA, YEDV, QSEC, CPXA, GLRK, BARA, CHEA, DCUS, ARCB, EVGS, BAES, TORS, YEGI, RCSD	522	185	16709	2.42235	0.986662	0.0811664	7.96636
GOTERM_BP_FAT	GO:0009090	homoserine biosynthetic process	3	0.00560852	0.00558424	THRA, ASD, LYSC	522	4	16709	24.0072	0.988538	0.0823477	8.23417
GOTERM_BP_FAT	GO:0042278	purine nucleoside metabolic process	9	0.0168256	0.0057301	ENTF, XDHA, COAE, TGT, XDHD, QUEA, PANF, SPOT, DFP	522	87	16709	3.31134	0.989804	0.0828864	8.4405
GOTERM_BP_FAT	GO:0009116	nucleoside metabolic process	12	0.0224341	0.005774	PYRE, ENTF, PURF, XDHA, COAE, TGT, XDHD, COBT, QUEA, PANF, SPOT, DFP	522	145	16709	2.64907	0.990157	0.0820149	8.50252
GOTERM_BP_FAT	GO:0044042	glucan metabolic process	7	0.0130866	0.00592284	GLGB, OPGH, GLGX, OPGD, YEDQ, BCSA, GLGP	522	53	16709	4.22768	0.991266	0.0825806	8.71248
GOTERM_BP_FAT	GO:0000271	polysaccharide biosynthetic process	29	0.0542157	0.00611976	MANA, ISPU, BCSA, RFBB, MRCB, LPXM, WZA, PRC, OPGD, LPXD, WAAC, WECB, ETK, GLGB, RFAH, OPGH, YEDQ, WBBI, DDLA, GLGP, GLMU, WCAH, GLGX, AMIC, MLTB, AMIB, MLTC, NAGZ, WCAM	522	540	16709	1.71903	0.992543	0.0837578	8.98958
GOTERM_BP_FAT	GO:0009110	vitamin biosynthetic process	18	0.0336511	0.00699513	PDXH, EUTT, NADB, THII, THIL, MENA, BIOA, COBT, THIP, BIOB, RFBB, MIND, BISC, PUUE, RIBF, RIBB, THIB, FOLC	522	280	16709	2.05776	0.996309	0.0936013	10.2119
GOTERM_BP_FAT	GO:0065003	macromolecular complex assembly	11	0.0205646	0.00716153	CUTA, FLIA, NRFB, RPOD, FDOI, FDNI, HYAC, RPON, YODB, RPLT, CCMF	522	129	16709	2.7295	0.996771	0.0941552	10.4425
GOTERM_BP_FAT	GO:0009451	RNA modification	14	0.0261731	0.00731083	THII, RSMB, CCA, MNMG, PRMA, QUEA, RHLE, RLUC, ISCS, RLUD, TGT, RLMF, RLMG, TRUA	522	192	16709	2.33403	0.997136	0.0944794	10.6489
GOTERM_BP_FAT	GO:0009165	nucleotide biosynthetic process	17	0.0317816	0.00770748	PURH, ATPA, NADB, PURF, PURL, ATPI, RFBB, YBHA, GUAC, PURA, PYRE, CARA, GUAB, YAHI, MGTA, RHO, GMK	522	260	16709	2.09293	0.997918	0.0977887	11.1952
GOTERM_BP_FAT	GO:0009064	glutamine family amino acid metabolic process	17	0.0317816	0.00826618	YQEA, PURF, ARGD, PURL, GLND, GLNA, RPON, PROB, ASTE, ASTB, CARA, YAHI, GLTI, PROP, ARGH, GLTB, ARGI	522	262	16709	2.07696	0.998672	0.102899	11.9594
GOTERM_BP_FAT	GO:0006575	cellular amino acid derivative metabolic process	15	0.0280426	0.00829549	EUTT, POTG, TRPA, DFP, GSS, TRPB, SPEC, TRPE, RSSA, SPEF, FIXC, TNAB, YBDK, PUUE, GSHA	522	217	16709	2.21264	0.998703	0.101669	11.9993
GOTERM_BP_FAT	GO:0009226	nucleotide-sugar biosynthetic process	4	0.00747803	0.00848827	USHA, GLMU, MANA, RFBB	522	14	16709	9.14559	0.998889	0.102352	12.2614
GOTERM_BP_FAT	GO:0016310	phosphorylation	22	0.0411292	0.00861794	YEDV, CITA, ATPA, QSEC, THIK, CPXA, NUOL, PTSP, GLRK, ATPI, BARA, CHEA, HYFB, DCUS, ARCB, EVGS, BAES, YEGI, MGTA, TORS, RCSD, RHO	522	381	16709	1.84832	0.998999	0.102301	12.4373
GOTERM_BP_FAT	GO:0051186	cofactor metabolic process	34	0.0635633	0.00888714	BIOA, COBT, SCPC, BIOB, RFBB, MIND, FUMB, ZWF, HSCA, DFP, BISC, ACEF, ACNB, HEMD, YBDK, YIFB, GLXR, GLTA, PANF, NADB, EUTT, ENTF, ENTD, TESB, COAE, MENA, LPD, HEMY, SDHA, SUCA, GSHA, XYLA, UBIG, FOLC	522	684	16709	1.59112	0.999194	0.103802	12.8015
GOTERM_BP_FAT	GO:0018130	heterocycle biosynthetic process	23	0.0429987	0.00917521	EUTT, XDHA, THII, THIL, BIOA, COBT, XDHD, THIP, HEMY, BIOB, MIND, PROB, TRPA, BISC, TRPB, HISF, TRPE, HEMD, TNAB, PROP, YIFB, THIB, FOLC	522	407	16709	1.8089	0.999361	0.105463	13.1896
GOTERM_BP_FAT	GO:0033865	nucleoside bisphosphate metabolic process	5	0.00934754	0.00927842	ENTF, COAE, PANF, SPOT, DFP	522	27	16709	5.9277	0.999412	0.105085	13.3282
GOTERM_BP_FAT	GO:0042398	cellular amino acid derivative biosynthetic process	10	0.0186951	0.00934347	GSS, TRPB, SPEC, TRPE, POTG, SPEF, YBDK, TNAB, GSHA, TRPA	522	114	16709	2.80786	0.999442	0.104313	13.4155
GOTERM_BP_FAT	GO:0042401	biogenic amine biosynthetic process	8	0.0149561	0.00942464	GSS, TRPB, SPEC, TRPE, POTG, SPEF, TNAB, TRPA	522	76	16709	3.36943	0.999477	0.103731	13.5243
GOTERM_BP_FAT	GO:0034622	cellular macromolecular complex assembly	8	0.0149561	0.010097	CUTA, NRFB, FDOI, FDNI, HYAC, YODB, RPLT, CCMF	522	77	16709	3.32567	0.999696	0.109249	14.4206
GOTERM_BP_FAT	GO:0044265	cellular macromolecule catabolic process	8	0.0149561	0.010097	NFO, RNE, RNHA, RECB, MCRB, RECE, YBHP, SBCC	522	77	16709	3.32567	0.999696	0.109249	14.4206
GOTERM_BP_FAT	GO:0006164	purine nucleotide biosynthetic process	12	0.0224341	0.0107273	PURH, ATPA, PURF, GUAB, PURL, MGTA, ATPI, YBHA, GUAC, RHO, PURA, GMK	522	158	16709	2.43111	0.999817	0.114161	15.253
GOTERM_BP_FAT	GO:0016051	carbohydrate biosynthetic process	31	0.0579548	0.0111928	MANA, ISPU, NAGE, BCSA, RFBB, MRCB, LPXM, WZA, PRC, OPGD, LPXD, WAAC, WECB, ETK, GLGB, RFAH, OPGH, YEDQ, WBBI, DDLA, AGAD, GLGP, GLMU, WCAH, GLGX, AMIC, MLTB, AMIB, MLTC, NAGZ, WCAM	522	617	16709	1.60826	0.999874	0.117285	15.8628
GOTERM_BP_FAT	GO:0017004	cytochrome complex assembly	7	0.0130866	0.0116377	CUTA, NRFB, FDOI, FDNI, HYAC, YODB, CCMF	522	61	16709	3.67323	0.999912	0.120115	16.4419
GOTERM_BP_FAT	GO:0051301	cell division	13	0.0243036	0.0118705	FLK, YCIB, FTSY, XERC, ISPU, MUKB, DAMX, FTSA, MIND, ACRF, ACRE, NAGZ, DICB	522	182	16709	2.2864	0.999927	0.120828	16.7434
GOTERM_BP_FAT	GO:0019521	D-gluconate metabolic process	4	0.00747803	0.0124694	GHRB, IDNT, GNTU, IDNR	522	16	16709	8.00239	0.999955	0.12498	17.5143
GOTERM_BP_FAT	GO:0019520	aldonic acid metabolic process	4	0.00747803	0.0124694	GHRB, IDNT, GNTU, IDNR	522	16	16709	8.00239	0.999955	0.12498	17.5143
GOTERM_BP_FAT	GO:0006353	transcription termination	3	0.00560852	0.013392	NUSA, NUSG, RHO	522	6	16709	16.0048	0.999979	0.132002	18.689
GOTERM_BP_FAT	GO:0006163	purine nucleotide metabolic process	12	0.0224341	0.0138944	PURH, ATPA, PURF, GUAB, PURL, MGTA, ATPI, YBHA, GUAC, RHO, PURA, GMK	522	164	16709	2.34216	0.999986	0.134983	19.322
GOTERM_BP_FAT	GO:0009057	macromolecule catabolic process	15	0.0280426	0.0146927	MALZ, NFO, GLGX, RNE, RNHA, AMIC, RECB, AMIB, AMPD, MCRB, YAGH, RECE, YBHP, SBCC, MALP	522	233	16709	2.0607	0.999993	0.140525	20.3185
GOTERM_BP_FAT	GO:0009152	purine ribonucleotide biosynthetic process	10	0.0186951	0.0148765	PURH, ATPA, GUAB, PURL, MGTA, ATPI, YBHA, GUAC, RHO, GMK	522	123	16709	2.6024	0.999994	0.140497	20.5463
GOTERM_BP_FAT	GO:0034660	ncRNA metabolic process	21	0.0392597	0.0148854	GLTX, RSMB, TYRS, MNMG, CCA, ILES, QUEA, SERS, ALAS, PHET, RLUC, ISCS, PTH, RLUD, KPTA, TGT, ASNA, RLMF, RLMG, TRUA, TUSC	522	377	16709	1.78303	0.999994	0.138946	20.5572
GOTERM_BP_FAT	GO:0005976	polysaccharide metabolic process	34	0.0635633	0.0152521	MANA, ISPU, BCSA, AMPD, RFBB, AIS, MRCB, LPXM, WZA, PRC, OPGD, LPXD, WAAC, WECB, MALP, GLGB, ETK, RFAH, OPGH, MALZ, YEDQ, WBBI, DDLA, YAGH, GLGP, GLMU, WCAH, GLGX, AMIC, MLTB, AMIB, MLTC, NAGZ, WCAM	522	712	16709	1.52855	0.999995	0.140513	21.0099
GOTERM_BP_FAT	GO:0009991	response to extracellular stimulus	10	0.0186951	0.0156143	DPS, PSIF, SSPA, RUVB, UVRD, RECQ, RSPA, RECA, CSTA, SPOT	522	124	16709	2.58142	0.999996	0.142002	21.4545
GOTERM_BP_FAT	GO:0009150	purine ribonucleotide metabolic process	10	0.0186951	0.0163787	PURH, ATPA, GUAB, PURL, MGTA, ATPI, YBHA, GUAC, RHO, GMK	522	125	16709	2.56077	0.999998	0.146812	22.3852
GOTERM_BP_FAT	GO:0006576	biogenic amine metabolic process	11	0.0205646	0.0176715	GSS, TRPB, SPEC, EUTT, TRPE, POTG, RSSA, SPEF, FIXC, TNAB, TRPA	522	148	16709	2.37909	0.999999	0.155812	23.9359
GOTERM_BP_FAT	GO:0009119	ribonucleoside metabolic process	9	0.0168256	0.0177926	ENTF, XDHA, COAE, TGT, XDHD, QUEA, PANF, SPOT, DFP	522	106	16709	2.71779	0.999999	0.155107	24.0796
GOTERM_BP_FAT	GO:0015849	organic acid transport	22	0.0411292	0.0178578	CADB, YIFK, YFBS, DCUA, TDCC, DCUB, YGJI, ADIC, DCUD, FLIY, GNTU, GLCA, LIVG, ATOE, ABGT, YJEH, IDNT, YCAM, GLTI, TNAB, YHDZ, YHDW	522	409	16709	1.72179	0.999999	0.15397	24.1569
GOTERM_BP_FAT	GO:0046942	carboxylic acid transport	22	0.0411292	0.0178578	CADB, YIFK, YFBS, DCUA, TDCC, DCUB, YGJI, ADIC, DCUD, FLIY, GNTU, GLCA, LIVG, ATOE, ABGT, YJEH, IDNT, YCAM, GLTI, TNAB, YHDZ, YHDW	522	409	16709	1.72179	0.999999	0.15397	24.1569
GOTERM_BP_FAT	GO:0006812	cation transport	28	0.0523462	0.0185065	FHUE, CIRA, ZITB, YIDK, YFEH, YIDP, YIHP, TTDT, YJCE, NHAB, MGTA, FECA, FECB, NIKC, PANF, YFBS, ATPA, ENTF, ENTD, ATPI, YAGG, ACTP, ZNUC, AMTB, CYOB, CUSA, RHO, KEFB	522	564	16709	1.58913	1	0.157464	24.922
GOTERM_BP_FAT	GO:0006461	protein complex assembly	10	0.0186951	0.018836	CUTA, FLIA, NRFB, RPOD, FDOI, FDNI, HYAC, RPON, YODB, CCMF	522	128	16709	2.50075	1	0.158389	25.3079
GOTERM_BP_FAT	GO:0070271	protein complex biogenesis	10	0.0186951	0.018836	CUTA, FLIA, NRFB, RPOD, FDOI, FDNI, HYAC, RPON, YODB, CCMF	522	128	16709	2.50075	1	0.158389	25.3079
GOTERM_BP_FAT	GO:0034613	cellular protein localization	6	0.011217	0.0193394	SECA, FTSY, SECE, SECY, YIDC, FFH	522	50	16709	3.84115	1	0.160628	25.8938
GOTERM_BP_FAT	GO:0070727	cellular macromolecule localization	6	0.011217	0.0193394	SECA, FTSY, SECE, SECY, YIDC, FFH	522	50	16709	3.84115	1	0.160628	25.8938
GOTERM_BP_FAT	GO:0009310	amine catabolic process	13	0.0243036	0.0194712	EUTT, GLMU, POTG, ARGD, FIXC, TNAB, PUUE, RSPA, NAGE, EUTB, ASTE, CAIF, ASTB	522	195	16709	2.13397	1	0.159995	26.0464
GOTERM_BP_FAT	GO:0006399	tRNA metabolic process	16	0.0299121	0.0207271	GLTX, TYRS, CCA, MNMG, ILES, QUEA, SERS, ALAS, PHET, ISCS, PTH, KPTA, TGT, ASNA, TRUA, TUSC	522	267	16709	1.91818	1	0.16779	27.4866
GOTERM_BP_FAT	GO:0031667	response to nutrient levels	6	0.011217	0.0209095	DPS, PSIF, SSPA, RSPA, CSTA, SPOT	522	51	16709	3.76583	1	0.167473	27.6936
GOTERM_BP_FAT	GO:0042594	response to starvation	6	0.011217	0.0209095	DPS, PSIF, SSPA, RSPA, CSTA, SPOT	522	51	16709	3.76583	1	0.167473	27.6936
GOTERM_BP_FAT	GO:0006796	phosphate metabolic process	22	0.0411292	0.0221787	YEDV, CITA, ATPA, QSEC, THIK, CPXA, NUOL, PTSP, GLRK, ATPI, BARA, CHEA, HYFB, DCUS, ARCB, EVGS, BAES, YEGI, MGTA, TORS, RCSD, RHO	522	418	16709	1.68471	1	0.175064	29.1187
GOTERM_BP_FAT	GO:0015672	monovalent inorganic cation transport	17	0.0317816	0.0224024	ATPA, YFBS, YIDK, YFEH, ATPI, YAGG, YIDP, YIHP, ACTP, YJCE, TTDT, NHAB, MGTA, CYOB, RHO, KEFB, PANF	522	294	16709	1.85089	1	0.174977	29.367
GOTERM_BP_FAT	GO:0015936	coenzyme A metabolic process	4	0.00747803	0.023155	ENTF, COAE, PANF, DFP	522	20	16709	6.40192	1	0.178636	30.1969
GOTERM_BP_FAT	GO:0015937	coenzyme A biosynthetic process	4	0.00747803	0.023155	ENTF, COAE, PANF, DFP	522	20	16709	6.40192	1	0.178636	30.1969
GOTERM_BP_FAT	GO:0006814	sodium ion transport	10	0.0186951	0.0289567	YFBS, TTDT, YJCE, NHAB, YIDK, YFEH, YAGG, ACTP, YIHP, PANF	522	138	16709	2.31953	1	0.216713	36.2946
GOTERM_BP_FAT	GO:0009092	homoserine metabolic process	3	0.00560852	0.0302102	THRA, ASD, LYSC	522	9	16709	10.6699	1	0.223039	37.5448
GOTERM_BP_FAT	GO:0043623	cellular protein complex assembly	7	0.0130866	0.0311396	CUTA, NRFB, FDOI, FDNI, HYAC, YODB, CCMF	522	76	16709	2.94825	1	0.227094	38.4571
GOTERM_BP_FAT	GO:0045229	external encapsulating structure organization	16	0.0299121	0.0315368	YFCS, ETK, YRAI, LPTD, ISPU, DDPX, DDLA, AMPD, MRCB, GLMU, AMIC, MLTB, AMIB, MLTC, YQIH, NAGZ	522	282	16709	1.81615	1	0.227637	38.8431
GOTERM_BP_FAT	GO:0006534	cysteine metabolic process	5	0.00934754	0.0324941	CYSK, CYSJ, CYSI, ISCS, FLIY	522	39	16709	4.10379	1	0.231727	39.7642
GOTERM_BP_FAT	GO:0046417	chorismate metabolic process	7	0.0130866	0.0329179	TRPB, TRPE, TYRA, SHIA, TNAB, AROD, TRPA	522	77	16709	2.90996	1	0.23238	40.1678
GOTERM_BP_FAT	GO:0009260	ribonucleotide biosynthetic process	10	0.0186951	0.0352327	PURH, ATPA, GUAB, PURL, MGTA, ATPI, YBHA, GUAC, RHO, GMK	522	143	16709	2.23843	1	0.244682	42.3281
GOTERM_BP_FAT	GO:0030001	metal ion transport	23	0.0429987	0.035267	YFBS, ENTF, FHUE, CIRA, ENTD, ZITB, YIDK, YFEH, YAGG, YIDP, YIHP, ACTP, YJCE, TTDT, NHAB, ZNUC, MGTA, FECA, FECB, NIKC, CUSA, PANF, KEFB	522	466	16709	1.57987	1	0.24283	42.3595
GOTERM_BP_FAT	GO:0006732	coenzyme metabolic process	23	0.0429987	0.0371051	ENTF, NADB, TESB, COAE, MENA, LPD, SCPC, RFBB, FUMB, ZWF, DFP, SDHA, SUCA, ACEF, ACNB, YBDK, GSHA, GLXR, XYLA, GLTA, UBIG, FOLC, PANF	522	468	16709	1.57312	1	0.251831	44.0219
GOTERM_BP_FAT	GO:0042435	indole derivative biosynthetic process	4	0.00747803	0.0375242	TRPB, TRPE, TNAB, TRPA	522	24	16709	5.33493	1	0.252239	44.3946
GOTERM_BP_FAT	GO:0000162	tryptophan biosynthetic process	4	0.00747803	0.0375242	TRPB, TRPE, TNAB, TRPA	522	24	16709	5.33493	1	0.252239	44.3946
GOTERM_BP_FAT	GO:0046219	indolalkylamine biosynthetic process	4	0.00747803	0.0375242	TRPB, TRPE, TNAB, TRPA	522	24	16709	5.33493	1	0.252239	44.3946
GOTERM_BP_FAT	GO:0009259	ribonucleotide metabolic process	10	0.0186951	0.0379862	PURH, ATPA, GUAB, PURL, MGTA, ATPI, YBHA, GUAC, RHO, GMK	522	145	16709	2.20756	1	0.252892	44.8028
GOTERM_BP_FAT	GO:0046907	intracellular transport	5	0.00934754	0.0381277	SECA, FTSY, SECE, SECY, FFH	522	41	16709	3.90361	1	0.251674	44.9272
GOTERM_BP_FAT	GO:0006886	intracellular protein transport	5	0.00934754	0.0381277	SECA, FTSY, SECE, SECY, FFH	522	41	16709	3.90361	1	0.251674	44.9272
GOTERM_BP_FAT	GO:0006811	ion transport	37	0.0691718	0.039118	FHUE, CIRA, OMPN, PITA, PITB, ZITB, YIDK, YFEH, YIDP, YIHP, YFEO, YJCE, TTDT, WZA, NHAB, MGTA, NMPC, FECA, FECB, NIKC, PANF, YFBS, ATPA, ENTF, ENTD, PHNC, ATPI, GLCA, YAGG, ACTP, ZNUC, AMTB, CYOB, PHNP, CUSA, KEFB, RHO	522	851	16709	1.39172	1	0.255352	45.7909
GOTERM_BP_FAT	GO:0006541	glutamine metabolic process	6	0.011217	0.0437605	CARA, PURF, PURL, GLND, GLNA, GLTB	522	62	16709	3.0977	1	0.279346	49.6736
GOTERM_BP_FAT	GO:0006084	acetyl-CoA metabolic process	8	0.0149561	0.0459369	SDHA, SUCA, ACEF, ACNB, LPD, SCPC, FUMB, GLTA	522	105	16709	2.43883	1	0.289046	51.4028
GOTERM_BP_FAT	GO:0042430	indole and derivative metabolic process	4	0.00747803	0.0460638	TRPB, TRPE, TNAB, TRPA	522	26	16709	4.92455	1	0.28754	51.502
GOTERM_BP_FAT	GO:0042434	indole derivative metabolic process	4	0.00747803	0.0460638	TRPB, TRPE, TNAB, TRPA	522	26	16709	4.92455	1	0.28754	51.502
GOTERM_BP_FAT	GO:0006586	indolalkylamine metabolic process	4	0.00747803	0.0460638	TRPB, TRPE, TNAB, TRPA	522	26	16709	4.92455	1	0.28754	51.502
GOTERM_BP_FAT	GO:0006568	tryptophan metabolic process	4	0.00747803	0.0460638	TRPB, TRPE, TNAB, TRPA	522	26	16709	4.92455	1	0.28754	51.502
GOTERM_BP_FAT	GO:0019344	cysteine biosynthetic process	4	0.00747803	0.0460638	CYSK, CYSJ, CYSI, FLIY	522	26	16709	4.92455	1	0.28754	51.502
GOTERM_BP_FAT	GO:0009250	glucan biosynthetic process	5	0.00934754	0.0475608	GLGB, OPGH, OPGD, YEDQ, BCSA	522	44	16709	3.63745	1	0.293332	52.6567
GOTERM_BP_FAT	GO:0009163	nucleoside biosynthetic process	5	0.00934754	0.0475608	XDHA, TGT, XDHD, COBT, QUEA	522	44	16709	3.63745	1	0.293332	52.6567
GOTERM_BP_FAT	GO:0044264	cellular polysaccharide metabolic process	21	0.0392597	0.0485865	ETK, GLGB, RFAH, MANA, OPGH, YEDQ, WBBI, BCSA, RFBB, AIS, GLGP, LPXM, GLMU, WZA, WCAH, GLGX, OPGD, LPXD, WAAC, WECB, WCAM	522	430	16709	1.56326	1	0.296531	53.4331
GOTERM_BP_FAT	GO:0006006	glucose metabolic process	18	0.0336511	0.0499024	TDCE, GLGB, LPD, BCSA, GLGP, ZWF, YDJI, SUCA, ACEF, YBIY, GLGX, GLXR, PFLA, PYKA, XYLA, LDCC, PDHR, PFKB	522	351	16709	1.64152	1	0.30116	54.4117
GOTERM_BP_FAT	GO:0006605	protein targeting	4	0.00747803	0.050662	SECA, FTSY, SECE, FFH	522	27	16709	4.74216	1	0.302859	54.9678
GOTERM_BP_FAT	GO:0007047	cell wall organization	14	0.0261731	0.0542177	YFCS, YRAI, ISPU, DDPX, DDLA, AMPD, MRCB, GLMU, AMIC, MLTB, AMIB, MLTC, YQIH, NAGZ	522	253	16709	1.77128	1	0.318509	57.4876
GOTERM_BP_FAT	GO:0006414	translational elongation	5	0.00934754	0.0545028	TSF, EFP, FUSA, TUFA, TUFB	522	46	16709	3.4793	1	0.317677	57.6838
GOTERM_BP_FAT	GO:0009225	nucleotide-sugar metabolic process	6	0.011217	0.0547307	USHA, GLMU, MANA, BCSA, RFBB, WECB	522	66	16709	2.90996	1	0.316577	57.84
GOTERM_BP_FAT	GO:0046365	monosaccharide catabolic process	12	0.0224341	0.0567545	YDJI, SUCA, ACEF, ARAC, LPD, GLXR, PYKA, ZWF, LDCC, XYLA, PFKB, PDHR	522	205	16709	1.87373	1	0.324172	59.2041
GOTERM_BP_FAT	GO:0006096	glycolysis	8	0.0149561	0.0586937	YDJI, SUCA, ACEF, LPD, PYKA, LDCC, PFKB, PDHR	522	111	16709	2.307	1	0.331177	60.4722
GOTERM_BP_FAT	GO:0006007	glucose catabolic process	11	0.0205646	0.0592975	YDJI, SUCA, ACEF, LPD, GLXR, PYKA, ZWF, LDCC, XYLA, PFKB, PDHR	522	182	16709	1.93464	1	0.331784	60.8595
GOTERM_BP_FAT	GO:0044275	cellular carbohydrate catabolic process	13	0.0243036	0.0601346	YDJI, SUCA, ARAC, ACEF, GLGX, LPD, GLXR, PYKA, LDCC, XYLA, ZWF, PDHR, PFKB	522	232	16709	1.79364	1	0.333465	61.3906
GOTERM_BP_FAT	GO:0019320	hexose catabolic process	11	0.0205646	0.0628764	YDJI, SUCA, ACEF, LPD, GLXR, PYKA, ZWF, LDCC, XYLA, PFKB, PDHR	522	184	16709	1.91362	1	0.343819	63.0833
GOTERM_BP_FAT	GO:0009109	coenzyme catabolic process	7	0.0130866	0.0648213	SDHA, SUCA, ACNB, LPD, FUMB, GLTA, DFP	522	91	16709	2.46228	1	0.35033	64.2416
GOTERM_BP_FAT	GO:0051187	cofactor catabolic process	7	0.0130866	0.0648213	SDHA, SUCA, ACNB, LPD, FUMB, GLTA, DFP	522	91	16709	2.46228	1	0.35033	64.2416
GOTERM_BP_FAT	GO:0006525	arginine metabolic process	9	0.0168256	0.069577	YQEA, CARA, ARGD, YAHI, RPON, ASTE, ARGH, ASTB, ARGI	522	139	16709	2.07256	1	0.368961	66.9325
GOTERM_BP_FAT	GO:0051188	cofactor biosynthetic process	21	0.0392597	0.0740085	EUTT, ENTF, NADB, ENTD, COAE, MENA, LPD, COBT, HEMY, RFBB, MIND, HSCA, DFP, ACEF, HEMD, YBDK, GSHA, YIFB, UBIG, FOLC, PANF	522	452	16709	1.48717	1	0.385516	69.2684
GOTERM_BP_FAT	GO:0046395	carboxylic acid catabolic process	12	0.0224341	0.0742119	ACS, ACEF, ARGD, HDHA, GUDD, TNAB, ULAD, LPD, RSPA, ASTE, PRPD, ASTB	522	215	16709	1.78658	1	0.384005	69.3718
GOTERM_BP_FAT	GO:0016054	organic acid catabolic process	12	0.0224341	0.0742119	ACS, ACEF, ARGD, HDHA, GUDD, TNAB, ULAD, LPD, RSPA, ASTE, PRPD, ASTB	522	215	16709	1.78658	1	0.384005	69.3718
GOTERM_BP_FAT	GO:0006415	translational termination	3	0.00560852	0.0873204	PRFA, PRFB, FRR	522	16	16709	6.0018	1	0.434269	75.3915
GOTERM_BP_FAT	GO:0046164	alcohol catabolic process	12	0.0224341	0.0881307	YDJI, SUCA, ACEF, ARAC, LPD, GLXR, PYKA, ZWF, LDCC, XYLA, PFKB, PDHR	522	222	16709	1.73025	1	0.434879	75.7246
GOTERM_BP_FAT	GO:0009073	aromatic amino acid family biosynthetic process	6	0.011217	0.0884607	TRPB, TRPE, TYRA, TNAB, AROD, TRPA	522	76	16709	2.52707	1	0.433653	75.8591
GOTERM_BP_FAT	GO:0015837	amine transport	15	0.0280426	0.0894489	CADB, YIFK, TDCC, POTG, YGJI, ADIC, FLIY, LIVG, ABGT, YJEH, YCAM, GLTI, TNAB, YHDZ, YHDW	522	301	16709	1.59516	1	0.434935	76.2575
GOTERM_BP_FAT	GO:0055114	oxidation reduction	75	0.140213	0.0901386	LDHA, MAEB, THRA, YDBC, YODB, MHPF, YDJJ, NRFB, YDJG, MHPB, NUOC, NARH, DXR, NARG, GLXR, PFLA, PDHR, YKGF, GLTB, PDXH, YGCU, YBJS, NUOL, FADH, TORZ, TORY, SUCA, XYLE, GHRB, HYFB, FDOI, YHCC, TRXA, TRXB, FDOG, RSXD, GATD, BCP, ASD, XDHA, NAPH, QORA, FDNI, XDHD, FDNH, YNFE, ZWF, YDHV, BISC, DPS, TYRA, UXAB, HYAC, LLDD, NRDD, YBHP, ALLD, RPSA, NADB, CYSJ, CYSI, HDHA, YDIQ, HYDN, LPD, GUAC, SDHA, YEA…	522	2037	16709	1.17856	1	0.435081	76.532
GOTERM_BP_FAT	GO:0006085	acetyl-CoA biosynthetic process	2	0.00373902	0.0906612	ACEF, LPD	522	3	16709	21.3397	1	0.434602	76.738
GOTERM_BP_FAT	GO:0006086	acetyl-CoA biosynthetic process from pyruvate	2	0.00373902	0.0906612	ACEF, LPD	522	3	16709	21.3397	1	0.434602	76.738
GOTERM_BP_FAT	GO:0006596	polyamine biosynthetic process	4	0.00747803	0.0947281	GSS, SPEC, POTG, SPEF	522	35	16709	3.65824	1	0.447147	78.2842
GOTERM_BP_FAT	GO:0008617	guanosine metabolic process	3	0.00560852	0.0969902	TGT, QUEA, SPOT	522	17	16709	5.64875	1	0.452867	79.1022

## Sheet: Dayuling _CC
Category		Term	Count	%	PValue	Genes	List Total	Pop Hits	Pop Total	Fold Enrichment	Bonferroni	Benjamini	FDR
GOTERM_CC_FAT	GO:0005829	cytosol	10	0.0932401	6.66962e-08	ADIA, PYRG, GUAA, HEMB, ACKA, LYSS, KATG, GLYS, PFKA, LACI	45	132	7281	12.2576	2.60115e-06	2.60115e-06	6.06532e-05
GOTERM_CC_FAT	GO:0031967	organelle envelope	15	0.13986	3.2342e-06	CADB, YFGO, HYCC, PAL, YADH, XAPB, YDCV, CITT, NFRB, YJFF, ARAH, ZRAS, ARAJ, AMTB, CREC	45	566	7281	4.28799	0.000126126	6.3065e-05	0.00294113
GOTERM_CC_FAT	GO:0019866	organelle inner membrane	15	0.13986	3.2342e-06	CADB, YFGO, HYCC, PAL, YADH, XAPB, YDCV, CITT, NFRB, YJFF, ARAH, ZRAS, ARAJ, AMTB, CREC	45	566	7281	4.28799	0.000126126	6.3065e-05	0.00294113
GOTERM_CC_FAT	GO:0031090	organelle membrane	15	0.13986	4.3158e-06	CADB, YFGO, HYCC, PAL, YADH, XAPB, YDCV, CITT, NFRB, YJFF, ARAH, ZRAS, ARAJ, AMTB, CREC	45	580	7281	4.18448	0.000168303	5.6104e-05	0.0039247
GOTERM_CC_FAT	GO:0009274	peptidoglycan-based cell wall	18	0.167832	1.63168e-05	CADB, YFGO, HYCC, PAL, YADH, XAPB, MURF, YDCV, CITT, NFRB, PBPG, YJFF, ARAH, FECA, ZRAS, AMTB, ARAJ, CREC	45	946	7281	3.07865	0.00063616	0.000159078	0.0148375
GOTERM_CC_FAT	GO:0005618	cell wall	18	0.167832	2.01408e-05	CADB, YFGO, HYCC, PAL, YADH, XAPB, MURF, YDCV, CITT, NFRB, PBPG, YJFF, ARAH, FECA, ZRAS, AMTB, ARAJ, CREC	45	961	7281	3.03059	0.00078519	0.000157087	0.0183144
GOTERM_CC_FAT	GO:0005840	ribosome	4	0.037296	0.0135197	RPLJ, RPSC, RPLS, RPSH	45	83	7281	7.79759	0.411903	0.0846761	11.6431
GOTERM_CC_FAT	GO:0030312	external encapsulating structure	19	0.177156	0.0140703	CADB, YFGO, HYCC, PAL, YADH, XAPB, CCMA, MURF, YDCV, CITT, NFRB, PBPG, YJFF, ARAH, FECA, ZRAS, AMTB, ARAJ, CREC	45	1814	7281	1.69471	0.42457	0.0759123	12.0906
GOTERM_CC_FAT	GO:0030529	ribonucleoprotein complex	4	0.037296	0.0162975	RPLJ, RPSC, RPLS, RPSH	45	89	7281	7.27191	0.47315	0.0769805	13.8801
GOTERM_CC_FAT	GO:0043232	intracellular non-membrane-bounded organelle	6	0.0559441	0.020059	RPLJ, FLGK, RPSC, MUKB, RPLS, RPSH	45	262	7281	3.70534	0.546271	0.0840615	16.8289
GOTERM_CC_FAT	GO:0043228	non-membrane-bounded organelle	6	0.0559441	0.020059	RPLJ, FLGK, RPSC, MUKB, RPLS, RPSH	45	262	7281	3.70534	0.546271	0.0840615	16.8289
GOTERM_CC_FAT	GO:0031975	envelope	17	0.158508	0.0380231	CADB, YFGO, HYCC, PAL, YADH, XAPB, CCMA, YDCV, CITT, NFRB, YJFF, ARAH, FECA, ZRAS, AMTB, ARAJ, CREC	45	1715	7281	1.60385	0.779493	0.140309	29.7089
GOTERM_CC_FAT	GO:0005886	plasma membrane	24	0.223776	0.0841987	PQIB, FHUC, CADB, YFGO, HYCC, PAL, TUFB, YNFE, YADH, XAPB, CCMA, YDCV, CITT, NFRB, YDIK, YJFF, ARAH, FECA, ZRAS, AMTB, ARAJ, POTA, CREC, YBJL	45	2979	7281	1.30352	0.967622	0.267904	55.0611

## Sheet: Alishan _CC
Category		Term	Count	%	PValue	Genes	List Total	Pop Hits	Pop Total	Fold Enrichment	Bonferroni	Benjamini	FDR
GOTERM_CC_FAT	GO:0009274	peptidoglycan-based cell wall	55	0.426853	3.89632e-22	DCUA, MDTM, YIBH, YFIB, SETC, FECA, MDTF, EPTB, CVRA, YOAE, NLPD, GSPL, YICJ, MDLB, YHCD, GLCA, GLTS, TYRP, MURB, YBJG, MURG, CYDC, TNAB, HTRE, ASCF, UBIG, LNT, KUP, FTSH, YOJI, WECF, YRAJ, UHPT, PGAC, PGAB, HIPA, MRED, YDHC, UIDB, LLDP, PBPC, EMRY, BRNQ, YGJI, MDFA, URAA, DGOT, YHJE, ACTP, ABGT, TSX, BAMA, YHJV, YBIR, ANSP	104	946	7281	4.07033	1.59749e-20	1.59749e-20	3.58566e-19
GOTERM_CC_FAT	GO:0005618	cell wall	55	0.426853	8.31019e-22	DCUA, MDTM, YIBH, YFIB, SETC, FECA, MDTF, EPTB, CVRA, YOAE, NLPD, GSPL, YICJ, MDLB, YHCD, GLCA, GLTS, TYRP, MURB, YBJG, MURG, CYDC, TNAB, HTRE, ASCF, UBIG, LNT, KUP, FTSH, YOJI, WECF, YRAJ, UHPT, PGAC, PGAB, HIPA, MRED, YDHC, UIDB, LLDP, PBPC, EMRY, BRNQ, YGJI, MDFA, URAA, DGOT, YHJE, ACTP, ABGT, TSX, BAMA, YHJV, YBIR, ANSP	104	961	7281	4.00679	3.40718e-20	1.70359e-20	7.6476e-19
GOTERM_CC_FAT	GO:0019866	organelle inner membrane	39	0.302678	3.5348e-17	FTSH, YOJI, DCUA, MDTM, UHPT, PGAC, PGAB, YIBH, MRED, YDHC, UIDB, LLDP, YFIB, SETC, CVRA, EMRY, BRNQ, NLPD, YGJI, MDFA, YICJ, URAA, MDLB, GLCA, DGOT, GLTS, TYRP, YHJE, ACTP, ABGT, CYDC, MURG, TNAB, ASCF, YHJV, UBIG, LNT, ANSP, KUP	104	566	7281	4.82398	1.44927e-15	4.83089e-16	3.25296e-14
GOTERM_CC_FAT	GO:0031967	organelle envelope	39	0.302678	3.5348e-17	FTSH, YOJI, DCUA, MDTM, UHPT, PGAC, PGAB, YIBH, MRED, YDHC, UIDB, LLDP, YFIB, SETC, CVRA, EMRY, BRNQ, NLPD, YGJI, MDFA, YICJ, URAA, MDLB, GLCA, DGOT, GLTS, TYRP, YHJE, ACTP, ABGT, CYDC, MURG, TNAB, ASCF, YHJV, UBIG, LNT, ANSP, KUP	104	566	7281	4.82398	1.44927e-15	4.83089e-16	3.25296e-14
GOTERM_CC_FAT	GO:0031090	organelle membrane	39	0.302678	8.05421e-17	FTSH, YOJI, DCUA, MDTM, UHPT, PGAC, PGAB, YIBH, MRED, YDHC, UIDB, LLDP, YFIB, SETC, CVRA, EMRY, BRNQ, NLPD, YGJI, MDFA, YICJ, URAA, MDLB, GLCA, DGOT, GLTS, TYRP, YHJE, ACTP, ABGT, CYDC, MURG, TNAB, ASCF, YHJV, UBIG, LNT, ANSP, KUP	104	580	7281	4.70754	4.55191e-15	1.11022e-15	9.99201e-14
GOTERM_CC_FAT	GO:0030312	external encapsulating structure	56	0.434614	4.31025e-10	DCUA, MDTM, YIBH, YFIB, SETC, FECA, MDTF, EPTB, CVRA, YOAE, NLPD, GSPL, YICJ, MDLB, YHCD, GLCA, GLTS, TYRP, MURB, YBJG, MURG, CYDC, TNAB, HTRE, ASCF, UBIG, LNT, KUP, FTSH, YOJI, WECF, YRAJ, UHPT, PGAC, PGAB, HIPA, MRED, YDHC, UIDB, LLDP, PBPC, EMRY, BRNQ, YGJI, MDFA, URAA, DGOT, YHJE, ACTP, ABGT, BAMD, TSX, BAMA, YHJV, YBIR, ANSP	104	1814	7281	2.16127	1.7672e-08	3.5344e-09	3.96659e-07
GOTERM_CC_FAT	GO:0005886	plasma membrane	71	0.551028	2.17314e-08	FHUC, DCUA, MDTM, HTPG, YIBH, YFEO, FABI, SSUB, YFIB, SETC, FECA, EPTB, MDTF, YOAE, CVRA, YIGM, YFHM, YBBY, NLPD, GSPL, GSPM, YICJ, MDLB, GLCA, YHCD, GLTS, TYRP, GLPG, YBJG, MURG, CYDC, TNAB, HTRE, ASCF, LNT, KUP, FTSH, YOJI, WECF, YRAJ, UHPT, PGAC, PGAB, DJLA, YNFC, MRED, YDHC, LLDP, YFGF, RCSD, PBPC, DNAK, EMRY, BRNQ, YGJI, MDFA, URAA, DGOT, YHJE, ACTP, ABGT, YCAI, BAMD, YHDZ, TSX, BAMA, YHJV, …	104	2979	7281	1.66857	8.90986e-07	1.48498e-07	1.99987e-05
GOTERM_CC_FAT	GO:0031975	envelope	49	0.380287	2.1296e-07	DCUA, MDTM, YIBH, YFIB, SETC, FECA, MDTF, CVRA, NLPD, GSPL, YICJ, MDLB, GLCA, YHCD, GLTS, TYRP, CYDC, MURG, TNAB, HTRE, ASCF, UBIG, LNT, KUP, FTSH, YOJI, WECF, YRAJ, UHPT, PGAC, PGAB, MRED, YDHC, UIDB, LLDP, EMRY, BRNQ, YGJI, URAA, MDFA, DGOT, YHJE, ACTP, ABGT, BAMD, TSX, YHJV, BAMA, ANSP	104	1715	7281	2.00027	8.7313e-06	1.24733e-06	0.00019598
GOTERM_CC_FAT	GO:0005829	cytosol	9	0.0698487	0.000529093	ASPA, MAEB, KATG, CLPB, HTPG, FUMA, ANSB, LACI, PNCA	104	132	7281	4.77338	0.0214648	0.00270864	0.485852
GOTERM_CC_FAT	GO:0031225	anchored to membrane	8	0.0620877	0.00559915	YFHM, NLPD, YFIB, BAMD, PGAB, YNFC	104	152	7281	3.68472	0.205633	0.0252545	5.03597
GOTERM_CC_FAT	GO:0019898	extrinsic to membrane	9	0.0698487	0.0204725	FABI, FHUC, WECF, MURG, SSUB, HTPG, YHDZ, DNAK, FADK	104	241	7281	2.61447	0.571765	0.0813117	17.3336

## Sheet: Jinxuan _CC
Category		Term	Count	%	PValue	Genes	List Total	Pop Hits	Pop Total	Fold Enrichment	Bonferroni	Benjamini	FDR
GOTERM_CC_FAT	GO:0005840	ribosome	3	0.0771407	0.00544486	RPLL, RPSS, RPLF	11	83	7281	23.9244	0.113181	0.113181	4.18297
GOTERM_CC_FAT	GO:0030529	ribonucleoprotein complex	3	0.0771407	0.00623816	RPLL, RPSS, RPLF	11	89	7281	22.3115	0.128613	0.066519	4.77949
GOTERM_CC_FAT	GO:0009274	peptidoglycan-based cell wall	5	0.128568	0.031146	GNTP, FTSA, TYRP, YJGX, BTUB	11	946	7281	3.49846	0.501479	0.207083	21.9356
GOTERM_CC_FAT	GO:0005618	cell wall	5	0.128568	0.032818	GNTP, FTSA, TYRP, YJGX, BTUB	11	961	7281	3.44386	0.520067	0.167671	22.9837
GOTERM_CC_FAT	GO:0043232	intracellular non-membrane-bounded organelle	3	0.0771407	0.0479712	RPLL, RPSS, RPLF	11	262	7281	7.57911	0.66092	0.194509	31.9374
GOTERM_CC_FAT	GO:0043228	non-membrane-bounded organelle	3	0.0771407	0.0479712	RPLL, RPSS, RPLF	11	262	7281	7.57911	0.66092	0.194509	31.9374

## Sheet: Oriental Beauty_CC
Category		Term	Count	%	PValue	Genes	List Total	Pop Hits	Pop Total	Fold Enrichment	Bonferroni	Benjamini	FDR
GOTERM_CC_FAT	GO:0019866	organelle inner membrane	114	0.213124	2.75999e-48	PITA, PITB, ZITB, MALG, ATOE, MRCB, DTPA, YDJK, ABRB, YIAV, SETC, ACRF, NIKC, ACRE, PANF, ATPA, CHBC, ENTD, HOFC, OPGH, CAIT, NUOL, ATPI, GNTU, GLCA, THIP, PSSA, LACY, YQIK, FDOI, TNAB, NUPC, CSTA, YQIH, LNT, UBIG, CUSA, CADB, LPTD, NAGE, BARA, TRG, PTSG, LLDD, MANY, SEQA, FLHA, CPXA, PLSC, YCAD, YCAM, TORS, AMTB, YTFT, CYOB, CCMF, YIFK, TDCC, DCUA, DCUB, NEPI, DCUD, YIHP, TTDT, YJCE, AER, MGLC, …	319	566	7281	4.59715	2.37359e-46	2.37359e-46	2.97618e-45
GOTERM_CC_FAT	GO:0031967	organelle envelope	114	0.213124	2.75999e-48	PITA, PITB, ZITB, MALG, ATOE, MRCB, DTPA, YDJK, ABRB, YIAV, SETC, ACRF, NIKC, ACRE, PANF, ATPA, CHBC, ENTD, HOFC, OPGH, CAIT, NUOL, ATPI, GNTU, GLCA, THIP, PSSA, LACY, YQIK, FDOI, TNAB, NUPC, CSTA, YQIH, LNT, UBIG, CUSA, CADB, LPTD, NAGE, BARA, TRG, PTSG, LLDD, MANY, SEQA, FLHA, CPXA, PLSC, YCAD, YCAM, TORS, AMTB, YTFT, CYOB, CCMF, YIFK, TDCC, DCUA, DCUB, NEPI, DCUD, YIHP, TTDT, YJCE, AER, MGLC, …	319	566	7281	4.59715	2.37359e-46	2.37359e-46	2.97618e-45
GOTERM_CC_FAT	GO:0009274	peptidoglycan-based cell wall	145	0.271079	4.40443e-48	PITA, YQAA, PITB, ZITB, MALG, ATOE, MRCB, DTPA, YDJK, ABRB, FECA, YIAV, SETC, EPTA, NIKC, ACRF, ACRE, PANF, ATPA, ENTD, CHBC, HOFC, OPGH, CAIT, NUOL, ATPI, GLCA, THIP, LACY, PSSA, YQIK, FDOI, TNAB, NUPC, HTRE, RSXD, CSTA, YQIH, YQIG, LNT, CUSA, UBIG, CADB, OMPN, LPTG, LPTD, NAGE, BARA, PTSG, LLDD, MANY, SEQA, FLHA, CPXA, PLSC, YJGX, YCAD, GLMU, YDET, YCAM, TORS, AMTB, YTFT, CYOB, CCMF, YIFK, DCUA…	319	946	7281	3.49846	3.78781e-46	1.89391e-46	4.74943e-45
GOTERM_CC_FAT	GO:0031090	organelle membrane	115	0.214993	4.98884e-48	PITA, PITB, ZITB, MALG, ATOE, MRCB, DTPA, YDJK, ABRB, YIAV, SETC, ACRF, NIKC, ACRE, PANF, ATPA, CHBC, ENTD, HOFC, OPGH, CAIT, NUOL, ATPI, GNTU, GLCA, THIP, PSSA, LACY, YQIK, FDOI, TNAB, NUPC, CSTA, YQIH, LNT, UBIG, CUSA, CADB, LPTD, NAGE, BARA, TRG, PTSG, LLDD, MANY, SEQA, FLHA, CPXA, PLSC, YCAD, YCAM, TORS, AMTB, YTFT, CYOB, CCMF, YIFK, TDCC, DCUA, DCUB, NEPI, DCUD, YIHP, TTDT, YJCE, AER, MGLC, …	319	580	7281	4.52554	4.29041e-46	1.43014e-46	5.37962e-45
GOTERM_CC_FAT	GO:0005618	cell wall	146	0.272948	5.38234e-48	PITA, YQAA, PITB, ZITB, MALG, ATOE, MRCB, DTPA, YDJK, ABRB, FECA, YIAV, SETC, EPTA, NIKC, ACRF, ACRE, PANF, ATPA, ENTD, CHBC, HOFC, OPGH, CAIT, NUOL, ATPI, GLCA, THIP, LACY, PSSA, YQIK, FDOI, TNAB, NUPC, HTRE, RSXD, CSTA, YQIH, YQIG, LNT, CUSA, UBIG, CADB, OMPN, LPTG, LPTD, NAGE, BARA, PTSG, LLDD, MANY, SEQA, FLHA, CPXA, PLSC, YJGX, YCAD, GLMU, YDET, YCAM, TORS, AMTB, YTFT, CYOB, CCMF, YIFK, DCUA…	319	961	7281	3.46761	4.62882e-46	1.1572e-46	5.80395e-45
GOTERM_CC_FAT	GO:0030312	external encapsulating structure	158	0.295382	3.72992e-22	PITA, YQAA, PITB, ZITB, SURA, MALG, ATOE, MRCB, DTPA, WZA, GLTI, YDJK, ABRB, FECA, YIAV, SETC, EPTA, NIKC, ACRF, ACRE, PANF, ATPA, ENTD, CHBC, HOFC, OPGH, CAIT, NUOL, FLIY, ATPI, GLCA, THIP, LACY, PSSA, YDCS, YQIK, FDOI, TNAB, NUPC, HTRE, RSXD, CSTA, YQIH, THIB, YQIG, LNT, CUSA, UBIG, CADB, OMPN, LPTG, LPTD, NAGE, BARA, PTSG, NMPC, LLDD, MANY, YJIK, SEQA, FLHA, CPXA, PLSC, YJGX, YCAD, GLMU, YDET,…	319	1814	7281	1.98802	3.20773e-20	6.41546e-21	4.02209e-19
GOTERM_CC_FAT	GO:0005886	plasma membrane	211	0.394466	1.47995e-20	YQAA, MALG, ATOE, DTPA, ALSA, WZA, YDJK, ABRB, YIAV, EPTA, NIKC, ACRF, ACRE, PANF, ATPA, SRLE, RARD, CAIT, GNTU, ATPI, THIP, GLCA, RBSA, HTRE, RIBB, GFCD, YQCE, PLSY, NAGE, YLAB, YLAC, PTSG, RCSD, MANY, CDH, DPPF, FLHA, PHNC, CPXA, PLSC, YCIB, SAPD, GTRS, AMTB, CYOB, YIFK, NEPI, CSGG, YIHP, TTDT, YAFT, AER, NHAB, MGTA, NARH, NARG, MDTF, DAMX, GSPK, HEMY, LSRA, YAGG, UGPC, TORY, HYFB, ARCB, EVGS, …	319	2979	7281	1.61664	1.27276e-18	2.12126e-19	1.59587e-17
GOTERM_CC_FAT	GO:0031975	envelope	144	0.269209	4.76344e-18	PITA, PITB, ZITB, SURA, MALG, ATOE, MRCB, DTPA, WZA, GLTI, YDJK, ABRB, FECA, YIAV, SETC, NIKC, ACRF, ACRE, PANF, ATPA, ENTD, CHBC, HOFC, OPGH, CAIT, NUOL, FLIY, GNTU, ATPI, GLCA, THIP, LACY, PSSA, YDCS, YQIK, FDOI, TNAB, NUPC, HTRE, CSTA, YQIH, THIB, YQIG, LNT, CUSA, UBIG, CADB, OMPN, LPTD, NAGE, BARA, TRG, PTSG, NMPC, LLDD, MANY, YJIK, SEQA, FLHA, CPXA, PLSC, YCAD, YDET, YCAM, TORS, AMTB, YTFT, …	319	1715	7281	1.91646	4.09656e-16	5.85223e-17	5.13657e-15
GOTERM_CC_FAT	GO:0005829	cytosol	20	0.0373902	3.90857e-06	CYSK, ADIA, PURF, MAEB, HDHA, GLNA, TYRS, LPD, FUMB, SERS, SUCA, CARA, DAPA, GUAB, RIBB, LEUD, PYKA, CAN, LACI, GLTA	319	132	7281	3.45825	0.000336081	4.20164e-05	0.00421465
GOTERM_CC_FAT	GO:0019898	extrinsic to membrane	27	0.0504767	1.63845e-05	YPJA, MIND, ALSA, NUOC, DDPD, FTSY, NARH, NARG, FADK, MACA, ATPA, DPPF, POTG, YNCD, PHNC, LPD, TUFB, PLSC, LSRA, PSSA, RBSA, UGPC, ZNUC, SAPD, XYLG, YHDZ, RIBB	319	241	7281	2.5571	0.00140808	0.000156552	0.0176665
GOTERM_CC_FAT	GO:0030529	ribonucleoprotein complex	11	0.0205646	0.00520386	RPSB, RPSA, RPLL, RIML, FTSY, RPSP, SRA, RPLU, RPLT, RPSG, FFH	319	89	7281	2.821	0.361543	0.0438783	5.47079
GOTERM_CC_FAT	GO:0005840	ribosome	9	0.0168256	0.0278547	RPSB, RPSA, RPLL, RIML, RPSP, SRA, RPLU, RPLT, RPSG	319	83	7281	2.47494	0.911919	0.198174	26.2603
GOTERM_CC_FAT	GO:0031225	anchored to membrane	13	0.0243036	0.0336325	YFHM, GFCD, YAFT, YJBH, CSGG, PGAB, MLTC, BAMC, YAJG, ACRE, YAJI	319	152	7281	1.95209	0.947248	0.217436	30.8511
GOTERM_CC_FAT	GO:0043228	non-membrane-bounded organelle	19	0.0355207	0.0374753	RPSB, RPSA, DNAB, RPLL, TOPB, MUKB, SRA, DPS, RIML, RPSP, RECQ, PARE, RPLU, FLGG, RPLT, RPSG, FLID, SBCC, FLGE	319	262	7281	1.65521	0.962552	0.223282	33.7592
GOTERM_CC_FAT	GO:0043232	intracellular non-membrane-bounded organelle	19	0.0355207	0.0374753	RPSB, RPSA, DNAB, RPLL, TOPB, MUKB, SRA, DPS, RIML, RPSP, RECQ, PARE, RPLU, FLGG, RPLT, RPSG, FLID, SBCC, FLGE	319	262	7281	1.65521	0.962552	0.223282	33.7592
GOTERM_CC_FAT	GO:0009348	ornithine carbamoyltransferase complex	3	0.00560852	0.05587	ARCB, ARGI	319	9	7281	7.60815	0.992876	0.297536	46.2027

## Sheet: Dayuling _MF
Category		Term	Count	%	PValue	Genes	List Total	Pop Hits	Pop Total	Fold Enrichment	Bonferroni	Benjamini	FDR
GOTERM_MF_FAT	GO:0032553	ribonucleotide binding	27	0.251748	3.65373e-07	FHUC, DNAA, MUKB, DHAL, YADG, YADH, PHOH, NFRB, CREC, GLGC, ACKA, TUFA, TUFB, PURA, PYRG, CCMA, GUAA, MURF, LYSS, RIMK, GLYS, PCNB, HSDR, ZRAS, POTA, PFKA	70	2385	17785	2.87628	7.38026e-05	7.38026e-05	0.000458702
GOTERM_MF_FAT	GO:0032555	purine ribonucleotide binding	27	0.251748	3.65373e-07	FHUC, DNAA, MUKB, DHAL, YADG, YADH, PHOH, NFRB, CREC, GLGC, ACKA, TUFA, TUFB, PURA, PYRG, CCMA, GUAA, MURF, LYSS, RIMK, GLYS, PCNB, HSDR, ZRAS, POTA, PFKA	70	2385	17785	2.87628	7.38026e-05	7.38026e-05	0.000458702
GOTERM_MF_FAT	GO:0017076	purine nucleotide binding	27	0.251748	3.43028e-06	FHUC, DNAA, MUKB, DHAL, YADG, YADH, PHOH, NFRB, CREC, GLGC, ACKA, TUFA, TUFB, PURA, PYRG, CCMA, GUAA, MURF, LYSS, RIMK, GLYS, PCNB, HSDR, ZRAS, POTA, PFKA	70	2677	17785	2.56254	0.000692677	0.000346399	0.00430642
GOTERM_MF_FAT	GO:0005524	ATP binding	24	0.223776	5.76659e-06	FHUC, GLGC, DNAA, ACKA, MUKB, DHAL, YADG, YADH, PYRG, GUAA, CCMA, PHOH, MURF, LYSS, RIMK, NFRB, GLYS, PCNB, HSDR, ZRAS, POTA, CREC, PFKA	70	2225	17785	2.74055	0.00116418	0.000388209	0.00723935
GOTERM_MF_FAT	GO:0032559	adenyl ribonucleotide binding	24	0.223776	6.03551e-06	FHUC, GLGC, DNAA, ACKA, MUKB, DHAL, YADG, YADH, PYRG, GUAA, CCMA, PHOH, MURF, LYSS, RIMK, NFRB, GLYS, PCNB, HSDR, ZRAS, POTA, CREC, PFKA	70	2231	17785	2.73318	0.00121843	0.000304748	0.00757695
GOTERM_MF_FAT	GO:0000166	nucleotide binding	28	0.261072	2.54588e-05	FHUC, DNAA, CPDB, MUKB, DHAL, YADG, YADH, PHOH, NFRB, CREC, GLGC, ACKA, TUFA, TUFB, PURA, PYRG, CCMA, GUAA, MURF, LYSS, RIMK, GLYS, HSDR, ZRAS, PCNB, POTA, PFKA	70	3175	17785	2.24063	0.00512954	0.00102802	0.0319572
GOTERM_MF_FAT	GO:0001883	purine nucleoside binding	24	0.223776	4.57228e-05	FHUC, GLGC, DNAA, ACKA, MUKB, DHAL, YADG, YADH, PYRG, GUAA, CCMA, PHOH, MURF, LYSS, RIMK, NFRB, GLYS, PCNB, HSDR, ZRAS, POTA, CREC, PFKA	70	2523	17785	2.41685	0.0091937	0.00153819	0.057387
GOTERM_MF_FAT	GO:0030554	adenyl nucleotide binding	24	0.223776	4.57228e-05	FHUC, GLGC, DNAA, ACKA, MUKB, DHAL, YADG, YADH, PYRG, GUAA, CCMA, PHOH, MURF, LYSS, RIMK, NFRB, GLYS, PCNB, HSDR, ZRAS, POTA, CREC, PFKA	70	2523	17785	2.41685	0.0091937	0.00153819	0.057387
GOTERM_MF_FAT	GO:0001882	nucleoside binding	24	0.223776	5.94682e-05	FHUC, GLGC, DNAA, ACKA, MUKB, DHAL, YADG, YADH, PYRG, GUAA, CCMA, PHOH, MURF, LYSS, RIMK, NFRB, GLYS, PCNB, HSDR, ZRAS, POTA, CREC, PFKA	70	2565	17785	2.37728	0.0119411	0.00171466	0.074633
GOTERM_MF_FAT	GO:0003735	structural constituent of ribosome	5	0.04662	0.000226831	RPLJ, RPSC, RIMK, RPLS, RPSH	70	77	17785	16.4981	0.044791	0.00571176	0.2844
GOTERM_MF_FAT	GO:0005198	structural molecule activity	6	0.0559441	0.000281741	RPLJ, FLGK, RPSC, RIMK, RPLS, RPSH	70	149	17785	10.2311	0.05533	0.00630445	0.353133
GOTERM_MF_FAT	GO:0016879	ligase activity, forming carbon-nitrogen bonds	4	0.037296	0.0155679	PYRG, GUAA, MURF, PURA	70	135	17785	7.52804	0.957973	0.271629	17.8795
GOTERM_MF_FAT	GO:0019843	rRNA binding	3	0.027972	0.0167348	RPSC, RPLS, RPSH	70	51	17785	14.9454	0.966927	0.266489	19.0933
GOTERM_MF_FAT	GO:0003723	RNA binding	6	0.0559441	0.0222209	RPLJ, RPSC, RSMB, PCNB, RPLS, RPSH	70	414	17785	3.68219	0.989318	0.314954	24.5814
GOTERM_MF_FAT	GO:0009035	Type I site-specific deoxyribonuclease activity	2	0.018648	0.0381358	HSDR	70	10	17785	50.8143	0.999612	0.453471	38.6233
GOTERM_MF_FAT	GO:0042626	ATPase activity, coupled to transmembrane movement of substances	5	0.04662	0.0422647	FHUC, CCMA, ARAH, POTA, YADH	70	338	17785	3.75845	0.999837	0.46371	41.8501
GOTERM_MF_FAT	GO:0043492	ATPase activity, coupled to movement of substances	5	0.04662	0.0422647	FHUC, CCMA, ARAH, POTA, YADH	70	338	17785	3.75845	0.999837	0.46371	41.8501
GOTERM_MF_FAT	GO:0015405	P-P-bond-hydrolysis-driven transmembrane transporter activity	5	0.04662	0.046592	FHUC, CCMA, ARAH, POTA, YADH	70	349	17785	3.63999	0.999935	0.474038	45.0639
GOTERM_MF_FAT	GO:0015399	primary active transmembrane transporter activity	5	0.04662	0.046592	FHUC, CCMA, ARAH, POTA, YADH	70	349	17785	3.63999	0.999935	0.474038	45.0639
GOTERM_MF_FAT	GO:0016820	hydrolase activity, acting on acid anhydrides, catalyzing transmembrane movement of substances	5	0.04662	0.0507338	FHUC, CCMA, ARAH, POTA, YADH	70	359	17785	3.5386	0.999973	0.481769	47.986
GOTERM_MF_FAT	GO:0016779	nucleotidyltransferase activity	5	0.04662	0.0528788	GLGC, FLIA, RPOC, DNAE, PCNB	70	364	17785	3.48999	0.999983	0.475624	49.4424
GOTERM_MF_FAT	GO:0000287	magnesium ion binding	6	0.0559441	0.0649	HEMB, LYSS, RIMK, PTSP, PFKA, PURA	70	557	17785	2.73686	0.999999	0.529063	56.9334
GOTERM_MF_FAT	GO:0015666	restriction endodeoxyribonuclease activity	2	0.018648	0.0712305	HSDR	70	19	17785	26.7444	1	0.544162	60.4538
GOTERM_MF_FAT	GO:0070566	adenylyltransferase activity	2	0.018648	0.0891288	GLGC, PCNB	70	24	17785	21.1726	1	0.610493	69.0253

## Sheet: Alishan _MF
Category		Term	Count	%	PValue	Genes	List Total	Pop Hits	Pop Total	Fold Enrichment	Bonferroni	Benjamini	FDR
GOTERM_MF_FAT	GO:0043169	cation binding	36	0.279395	0.00280748	FHUC, YEGS, FTSH, MAEB, DEF, FEPB, ISPG, FUMA, NAPB, EUTB, ALAS, ILVB, DNAQ, RLMN, YIAY, KATG, HEMF, FECA, RNHA, PDXA, NORV, YGGW, GLTB, MNGB, TKTA, TREC, KDSC, LACZ, GLTS, ACTP, OTSA, YDEP, PRIA, RDGB, LNT, KUP	137	2876	17785	1.62498	0.57218	0.57218	3.69089
GOTERM_MF_FAT	GO:0043167	ion binding	36	0.279395	0.00306428	FHUC, YEGS, FTSH, MAEB, DEF, FEPB, ISPG, FUMA, NAPB, EUTB, ALAS, ILVB, DNAQ, RLMN, YIAY, KATG, HEMF, FECA, RNHA, PDXA, NORV, YGGW, GLTB, MNGB, TKTA, TREC, KDSC, LACZ, GLTS, ACTP, OTSA, YDEP, PRIA, RDGB, LNT, KUP	137	2891	17785	1.61654	0.604195	0.370869	4.02212
GOTERM_MF_FAT	GO:0046872	metal ion binding	35	0.271634	0.00326308	FHUC, YEGS, FTSH, MAEB, DEF, FEPB, ISPG, FUMA, NAPB, EUTB, ALAS, ILVB, DNAQ, RLMN, YIAY, KATG, HEMF, FECA, RNHA, PDXA, NORV, YGGW, GLTB, MNGB, TKTA, KDSC, LACZ, GLTS, ACTP, OTSA, YDEP, PRIA, RDGB, LNT, KUP	137	2793	17785	1.62679	0.62733	0.280372	4.27782
GOTERM_MF_FAT	GO:0031420	alkali metal ion binding	5	0.0388048	0.0039354	OTSA, LACZ, GLTS, ACTP, KUP	137	84	17785	7.72723	0.696033	0.257483	5.13791
GOTERM_MF_FAT	GO:0031402	sodium ion binding	3	0.0232829	0.0132206	LACZ, GLTS, ACTP	137	23	17785	16.9327	0.982034	0.552399	16.3079
GOTERM_MF_FAT	GO:0005506	iron ion binding	14	0.108653	0.0198221	FHUC, DEF, FEPB, ISPG, FUMA, NAPB, RLMN, YIAY, KATG, YDEP, FECA, NORV, GLTB, YGGW	137	896	17785	2.0284	0.997634	0.634954	23.495
GOTERM_MF_FAT	GO:0046914	transition metal ion binding	25	0.194024	0.0250079	FTSH, FHUC, MNGB, DEF, FEPB, ISPG, FUMA, LACZ, NAPB, EUTB, ALAS, DNAQ, RLMN, YIAY, KATG, HEMF, YDEP, FECA, PDXA, RDGB, PRIA, NORV, LNT, GLTB, YGGW	137	2075	17785	1.56407	0.999523	0.664667	28.7356
GOTERM_MF_FAT	GO:0016836	hydro-lyase activity	5	0.0388048	0.0777272	YAGE, HEMD, FUMA, PAAF, CAID	137	210	17785	3.09089	1	0.952854	66.1203
GOTERM_MF_FAT	GO:0015129	lactate transmembrane transporter activity	2	0.0155219	0.0809943	LLDP, GLCA	137	11	17785	23.6032	1	0.941235	67.691
GOTERM_MF_FAT	GO:0051082	unfolded protein binding	3	0.0232829	0.0815814	SECB, HTPG, DNAK	137	62	17785	6.28149	1	0.923471	67.966
GOTERM_MF_FAT	GO:0008028	monocarboxylic acid transmembrane transporter activity	3	0.0232829	0.0861347	LLDP, GLCA, ACTP	137	64	17785	6.0852	1	0.915659	70.0264
GOTERM_MF_FAT	GO:0016811	hydrolase activity, acting on carbon-nitrogen (but not peptide) bonds, in linear amides	4	0.0310438	0.0921985	AGAA, DEF, ANSB, PNCA	137	140	17785	3.70907	1	0.912346	72.5803

[truncated: 2 more sheets: Jinxuan _MF, Oriental Beauty_MF]
